# Supplementary material for: Binary combinatorial scanning reveals potent poly-alanine-substituted inhibitors of protein-protein interactions
Source: Commun Chem. 2022 Oct 14;5:128. doi: 10.1038/s42004-022-00737-w (PMC9814900; doi:10.1038/s42004-022-00737-w)
Supplement: Supplementary file 1 — Supplementary Information [file 42004_2022_737_MOESM1_ESM.pdf]

Supplementary Information for

**Binary combinatorial scanning reveals potent poly-alanine-substituted  
inhibitors of protein-protein interactions**

Xiyun Ye,<sup>1†</sup> Yen-Chun Lee,<sup>1†,a</sup> Zachary P. Gates,<sup>1,b</sup> Yingjie Ling,<sup>2</sup> Jennifer C. Mortensen,<sup>2</sup> Fan-Shen Yang,<sup>3</sup> Yu-Shan Lin,<sup>2</sup> Bradley L. Pentelute<sup>1,4,5,6\*</sup>

<sup>1</sup> Department of Chemistry, Massachusetts Institute of Technology, 77 Massachusetts Avenue, Cambridge, MA 02139, USA

<sup>2</sup> Department of Chemistry, Tufts University, 62 Talbot Avenue, Medford, MA 02155, USA

<sup>3</sup> Department of Chemistry and Frontier Research Center on Fundamental and Applied Sciences and Matters, National Tsing Hua University, 101, Sec. 2, Guang-Fu Road, Hsinchu 300, Taiwan

<sup>4</sup> The Koch Institute for Integrative Cancer Research, Massachusetts Institute of Technology, 500 Main Street, Cambridge, MA 02142, USA

<sup>5</sup> Center for Environmental Health Sciences, Massachusetts Institute of Technology, 77 Massachusetts Avenue, Cambridge, MA 02139, USA

<sup>6</sup> Broad Institute of MIT and Harvard, 415 Main Street, Cambridge, MA 02142, USA

\* Correspondence to: blp@mit.edu

† These authors contributed equally to this work

<sup>a</sup> *Current address:* Department of Chemistry, National Cheng Kung University, No.1, University Road, Tainan City 701, Taiwan

<sup>b</sup> *Current address:* p53Lab, Agency for Science, Technology and Research (A\*STAR), 8A Biomedical Grove, Singapore 138648, Singapore

## Contents

|       |                                                                                                |    |
|-------|------------------------------------------------------------------------------------------------|----|
| 1.    | Supplementary Note 1: Statistic analysis of alanine matrix.....                                | 2  |
| 2.    | Supplementary Methods 1: Preparation of combinatorial alanine library .....                    | 7  |
| 2.1   | Preparation of PMI-based combinatorial alanine library .....                                   | 7  |
| 2.2   | Preparation of HA tag-based combinatorial alanine library .....                                | 10 |
| 2.3   | Preparation of 14-3-3 binder-based combinatorial alanine library .....                         | 11 |
| 3.    | Supplementary Methods 2: In-solution affinity selection of combinatorial alanine library ..... | 13 |
| 3.1   | Method for HPSEC-based in-solution affinity selection .....                                    | 13 |
| 3.2   | Method for <i>de novo</i> peptide sequencing .....                                             | 13 |
| 3.3   | Affinity selection against MDM2 .....                                                          | 13 |
| 3.3.1 | Selection conditions.....                                                                      | 13 |
| 3.3.2 | Identified sequences from condition A .....                                                    | 14 |
| 3.3.3 | Identified sequences from condition B.....                                                     | 15 |
| 3.4   | Affinity selection with 12ca5 .....                                                            | 21 |
| 3.4.1 | Selection conditions.....                                                                      | 21 |
| 3.4.2 | Identified sequences from condition A .....                                                    | 22 |
| 3.4.3 | Identified sequences from condition B.....                                                     | 22 |
| 3.4.4 | Identified sequences from condition C.....                                                     | 23 |
| 3.5   | Affinity selection against 14-3-3.....                                                         | 23 |
| 3.5.1 | Selection condition.....                                                                       | 23 |
| 3.5.2 | Identified sequences.....                                                                      | 23 |
| 4.    | Supplementary Methods 3: Method of molecular docking .....                                     | 24 |
| 4.1   | Preparation of structures .....                                                                | 24 |
| 4.2   | Docking Experiment .....                                                                       | 25 |
| 4.3   | Docking result.....                                                                            | 25 |
| 5.    | Supplementary Note 2: Peptide characterization and validation.....                             | 26 |
| 5.1   | (i, i+4) alanine-substituted peptides.....                                                     | 26 |
| 5.2   | (i, i+4) perfluoroaryl stapled peptides .....                                                  | 30 |
| 5.3   | Multi-alanine-substituted peptides.....                                                        | 34 |
| 5.4   | Multi-alanine-substituted stapled peptides .....                                               | 43 |
| 6.    | Supplementary Methods 4: Binding validation by bio-layer interferometry .....                  | 46 |
| 6.1   | Methods for BLI assay.....                                                                     | 46 |
| 6.2   | Methods for BLI competition assay .....                                                        | 47 |
| 6.3   | Results of competition BLI assay .....                                                         | 49 |
| 7.    | Supplementary References.....                                                                  | 62 |

## 1. Supplementary Note 1: Statistic analysis of alanine matrix

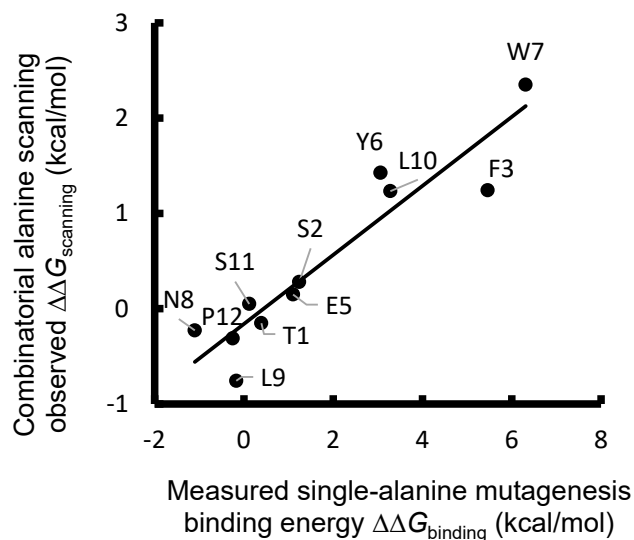

**Supplementary Fig. 1.  $\Delta\Delta G$  correlation between combinatorial alanine scanning and single alanine-mutagenesis.**  $\Delta\Delta G$  Correlation between the change of Gibbs free binding energy observed with combinatorial alanine scanning ( $\Delta\Delta G_{\text{scanning}}$ ) and the reported change of Gibbs free binding energy ( $\Delta\Delta G_{\text{binding}}$ ) measured by binding assay<sup>3</sup>.  $R^2 = 0.88$ . The linear correlation was fitted by the equation:  $y = 0.36x - 0.16$ .



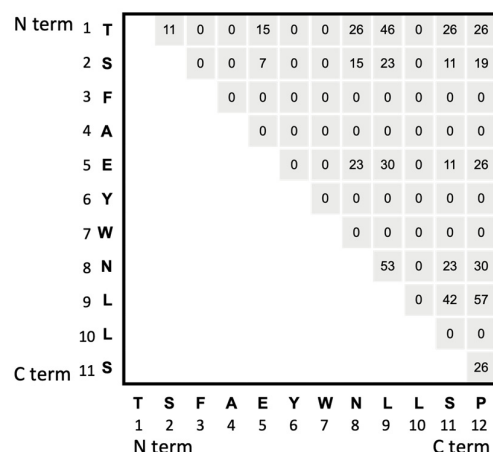

**Supplementary Fig. 3. Pairwise alanine matrix of the enriched sequences from a stringent selection condition.** The pairwise alanine tolerance is indicated by a substitution frequency matrix. Each box represents the pairwise alanine substitution frequency (Ala-Ala%) of two residues, calculated as the ratio of number of observed simultaneous pairwise alanine substitutions to the total number of identified sequences, expressed as  $\text{Ala-Ala}\% = [(n_{\text{Ala,Ala}})/n_{\text{total}}] \times 100\%$ . List of sequences is showed in supplementary information session 3.3.2.

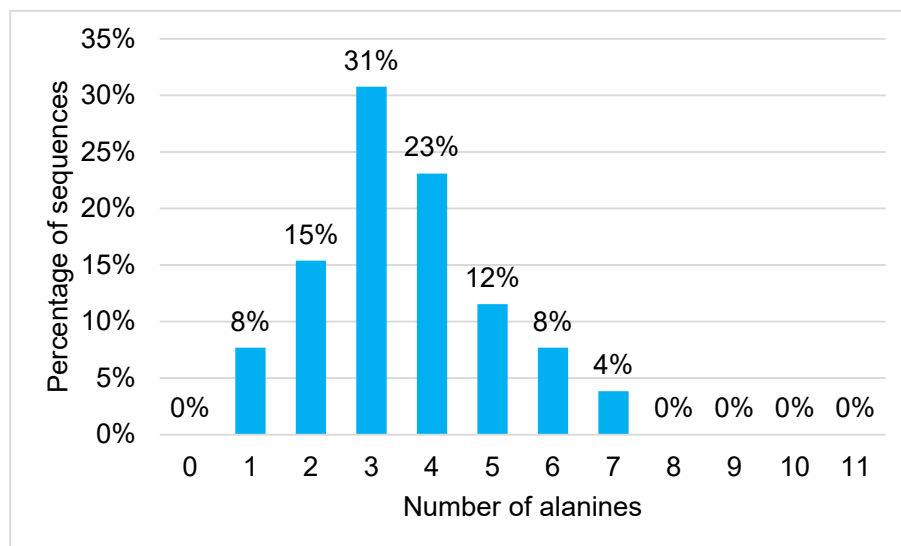

**Supplementary Fig. 4. Distribution of number of alanine residues per sequence.** The alanine distribution of the peptide sequences identified from the MDM2 affinity selection condition A (see section 4.3.2). The x-axis groups the sequences by their number of alanine residues and the y-axis shows the percentage of sequences that contain certain number of alanine residues. Alanine-substituted sequences with three and four substitutions were the most commonly identified sequences. Wild-type alanine is excluded from the analysis.

|   |    |   |    |    |   |   |    |    |    |    |    |   |
|---|----|---|----|----|---|---|----|----|----|----|----|---|
| T | 22 | 5 | 56 | 25 | 4 | 1 | 33 | 44 | 7  | 27 | 35 |   |
| S |    | 4 | 39 | 17 | 3 | 1 | 23 | 30 | 5  | 19 | 24 |   |
| F |    |   | 9  | 4  | 1 | 0 | 5  | 7  | 1  | 4  | 6  |   |
| A |    |   |    | 44 | 7 | 2 | 59 | 78 | 12 | 48 | 62 |   |
| E |    |   |    |    | 3 | 1 | 26 | 34 | 5  | 21 | 27 |   |
| Y |    |   |    |    |   | 0 | 4  | 5  | 1  | 3  | 4  |   |
| W |    |   |    |    |   |   | 1  | 2  | 0  | 1  | 1  |   |
| N |    |   |    |    |   |   |    | 46 | 7  | 28 | 37 |   |
| L |    |   |    |    |   |   |    |    | 9  | 37 | 48 |   |
| L |    |   |    |    |   |   |    |    |    | 6  | 7  |   |
| S |    |   |    |    |   |   |    |    |    |    | 30 |   |
|   | T  | S | F  | A  | E | Y | W  | N  | L  | L  | S  | P |

**Supplementary Fig. 5. Matrix of expected pairwise alanine percentage.** Each box represents the pairwise alanine substitution frequency  $(\text{Ala-Ala}\%)_{\text{exp}}$  of two residues, calculated as the product of single positional alanine percentage.

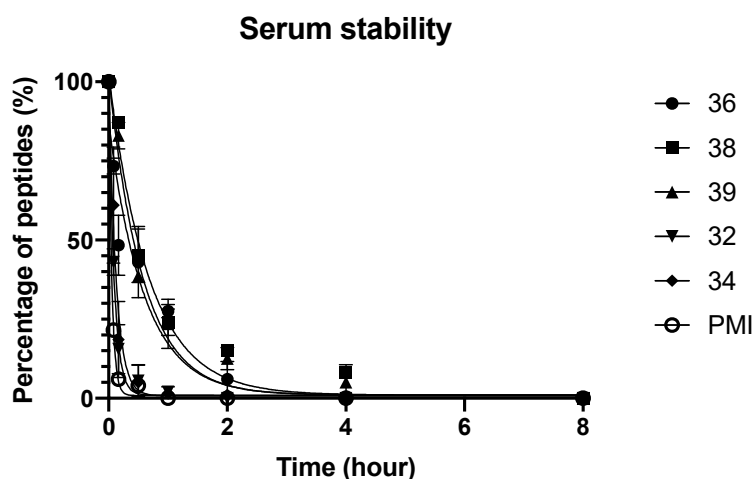

| Compound name   | PMI | 32  | 34  | 36 | 38 | 39 |
|-----------------|-----|-----|-----|----|----|----|
| Half-life (min) | 2.2 | 3.9 | 5.1 | 26 | 27 | 25 |

**Supplementary Fig. 6. Serum stability assay of peptide PMI, 32, 34, 36, 38, and 39.** 10  $\mu\text{M}$  peptide were incubated with 25% human serum in buffer 1x PBS (v/v). At each time point (0 min, 5 min, 10 min, 30 min, 1 h, 2 h, 4 h, 8 h, 12h and 24 h), the mixture was sampled, treated with 10% trichloroacetic acid, and centrifuged at 12,000  $g$  to remove serum proteins. The supernatant was acidified with 0.2% formic acid in water (v/v) and subjected to LC-MS analysis. The percentage of peptides (Y-axis) was calculated as the ratio of peak area in extracted ion chromatogram (EIC). Three experiments were carried out. The serum digestion curve was plotted using Prism8 software. The half-life of each peptide was calculated by fitted the digestion curve with the first order kinetic equation:  $[X]_t = [X]_0 \times e^{-kt}$ ,  $[X]$  is the remaining peptide percentage,  $t$  is the time in min. Half-life was calculated as  $t_{1/2} = (\ln 2)/k$ .

| Name       | Peptide                       | Affinity of Best Pose (kcal/mol) |
|------------|-------------------------------|----------------------------------|
| PMI        | TSFAEYWNLLSP-NH <sub>2</sub>  | -8.3                             |
| PMI-K      | TSFAEYWNLLSPK-NH <sub>2</sub> | -7.9                             |
| PMI-7Ala   | AAFAAYWAALAA-NH <sub>2</sub>  | -11.7                            |
| PMI-K-7Ala | AAFAAYWAALAAK-NH <sub>2</sub> | -10.4                            |

(Peptide 34)

**Supplementary Table 1. Molecular docking result.** Binding affinity of the best poses of the four peptide ligands to MDM2 inferred by molecular docking. Simultaneous Ala substitutions of all 7 non-hot spot residues (residues 1, 2, 5, 8, 9, 11, and 12) improves the calculated binding affinity with a  $\Delta\Delta G$  of -3.4 kcal/mol for PMI and -2.5 kcal/mol for PMI-K. The addition of Lys impairs the binding affinity by 0.4 kcal/mol for PMI wild type and by 1.3 kcal/mol for PMI mutant.

| Name | Sequence      | $K_D$ ratio <sup>3</sup> |
|------|---------------|--------------------------|
| PMI  | TSFAEYWNLLSP  | 1.0                      |
| T1A  | ASFAEYWNLLSP  | 1.9                      |
| S2A  | TAF AEYWNLLSP | 8.4                      |
| F3A  | TSAAEYWNLLSP  | 11750                    |
| A4A  | TSFAEYWNLLSP  | 1.0                      |
| E5A  | TSFAAYWNLLSP  | 6.7                      |
| Y6A  | TSFAEAWNLLSP  | 191                      |
| W7A  | TSFAEYANLLSP  | 50720                    |
| N8A  | TSFAEYWALLSP  | 0.2                      |
| L9A  | TSFAEYWNALSP  | 0.8                      |
| L10A | TSFAEYWNLASP  | 227                      |
| S11A | TSFAEYWNLLAP  | 1.2                      |
| P12A | TSFAEYWNLLSA  | 0.7                      |

**Supplementary Table 2. Theoretical  $K_D$ ' calculation.** Theoretical  $K_D$ ' is given by equation:  $RT \ln(K_D'/K_{D,PMI}) = \sum (\Delta\Delta G_{\text{binding}} \text{ of single alanine mutations}) = RT \ln(\prod K_D \text{ ratio})$ , using the reported  $K_{D,PMI} = 3.2 \pm 1.1 \text{ nM}^3$ . For example, peptide **17** (TSFAEYWAALSPK) has a theoretical  $K_D$ ' given by the equation:

$RT \ln(K_D'/K_{D,PMI}) = RT \ln(0.2 \times 0.8)$ , such that the theoretical  $K_D' = 0.2 \times 0.8 \times 3.2 \text{ nM} = 0.5 \text{ nM}$ .

## 2. Supplementary Methods 1: Preparation of combinatorial alanine library

### 2.1 Preparation of PMI-based combinatorial alanine library

Wide type sequence: TSFAEYWNLSP  
Library design: (X)<sub>12</sub>K-CONH<sub>2</sub> (X = WT or Ala),  
Library size: 2,048

#### Split-and-pool SPPS:

##### Coupling:

400 mg of 130 µm TentaGel resin (0.26 mmol/g, 0.10 mmol, 782770 beads/g, 3.13 x 10<sup>5</sup> beads) was placed in a 10 mL polypropylene syringe containing a porous polypropylene disc (Torviq). After swelling in DMF for 10 min, the resin was washed with DMF (3x). Fmoc-Rink amide linker (560 mg, 1.0 mmol, 10.0 equiv) was dissolved in 0.38 M HATU solution in DMF (2.4 mL, 0.49 mmol, 9.0 equiv), activated with DIEA (544 µL, 1.56 mmol, 30.0 equiv). The mixture was sonicated briefly, transferred to the fritted syringe containing the resin, and allowed to stir for 20 minutes. After the coupling solution was drained, and the resin was washed with DMF (3x). Fmoc protection group was achieved by soaking the resin with 20% piperidine in DMF (6 mL) for 5 min for twice, and then washed with DMF (3x). A sequential Fmoc-Lys(Boc)-OH coupling, Fmoc removal and DMF washes were performed in the same manner.

##### Portioning:

The peptidyl resin was suspended in DMF (6 mL), homogenized, then evenly divided among two 10 mL Torviq fritted syringes. After draining DMF from the syringes, the couplings were carried out as follows: Fmoc-protected WT amino acid and Fmoc-Ala-OH (0.26 mmol) were separately dissolved in 0.38 M HATU (0.66 mL, 0.26 mmol), activated with DIEA (136 µL, 0.36 mmol). Each of the activated amino acids was added to the individual resin-containing syringes (~200 mg, 0.052 mmol). After coupling for 20 min, the coupling solution was removed, and the resin was washed with DMF (3x). Then, all portions of peptidyl resin were combined and washed with DMF. Fmoc deprotection was achieved by treating the resin with 20% piperidine in DMF (6 mL, 5 min batch treatment), and this step was repeated twice. The resulting resin was then washed with DMF (3x). Twelve cycles of split-and-pool synthesis were performed using this procedure.

##### Cleavage from resin and global side chain deprotection:

The library was cleaved from resin and globally deprotected by treating the peptidyl resin with a cleavage cocktail containing 94% TFA, 2.5% EDT, 2.5% water, and 1.0% TIPS (v/v), for 1 h at ambient temperature. TFA was removed under a gentle stream of nitrogen gas, and the crude peptide was precipitated using cold Et<sub>2</sub>O (-80

°C). After centrifugation at 3220 rcf for 3 min, the supernatant was removed, and the precipitated peptide was triturated three times with cold Et<sub>2</sub>O. The resulting material was dissolved in 50% MeCN in water with 0.1% TFA, and lyophilized.

#### **Solid phase extraction:**

The library (60 mg) was dissolved in 6.0 mL of 5% MeCN in water with 0.1% TFA. 6 mL Bond Elut C18 cartridge (Agilent, P/N 12256130) was used for the solid phase extraction. A cartridge was conditioned with MeCN with 0.1% TFA (~10 mL), and then equilibrated with 1% MeCN in water with 0.1% TFA (~10 mL). Afterward, the library solution was loaded, and the cartridge was washed with 1% MeCN in water with 0.1% TFA (~10 mL). Sample elution was achieved by passing 70% MeCN in water with 0.1% TFA (~10 mL) through the cartridge. The final eluate was collected separately and lyophilized.

#### **Quality control:**

20 mg resin was weighed out, cleaved and analyzed by LC-MS/MS (20 mg loaded resin should theoretically contained 52 unique peptides; 52 = number of beads / copies of each peptide, number of beads = 7826, copies of peptide = number of total beads / library size =  $3.1 \times 10^5$  beads / 2,048 = 151). 55 unique peptide sequences were identified. The library passes the quality control if the amino acid percentage at each position was equally distributed.

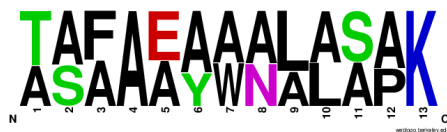

**Supplementary Fig. 7. An example weblogo plot of a peptide library with equally distributed amino acid percentages.**

| Entry | Peptide       | ALC (%) | m/z      | z | Mass      |
|-------|---------------|---------|----------|---|-----------|
| 1     | TSFAEYWALLAPK | 99      | 748.399  | 2 | 1494.7871 |
| 2     | AAFAEAWALLAAK | 99      | 666.3796 | 2 | 1330.7397 |
| 3     | AAAAEAAAAASPK | 98      | 549.8004 | 2 | 1097.5828 |
| 4     | AAAAAANAAAAK  | 98      | 521.2947 | 2 | 1040.5726 |
| 5     | TAAAEAAAAASPK | 98      | 564.806  | 2 | 1127.5935 |
| 6     | AAAAAASPK     | 98      | 520.7975 | 2 | 1039.5774 |
| 7     | AAAAAASAK     | 98      | 507.7916 | 2 | 1013.5618 |
| 8     | TAAAEANLASAK  | 98      | 594.3304 | 2 | 1186.6306 |
| 9     | TAAAAAASAK    | 98      | 522.7954 | 2 | 1043.5723 |
| 10    | AAAAEAAALAAK  | 98      | 549.814  | 2 | 1097.6191 |
| 11    | TAFAEAAAALAAK | 98      | 602.8406 | 2 | 1203.6611 |
| 12    | AAFAAAAALAAK  | 98      | 558.8314 | 2 | 1115.645  |
| 13    | TSFAEYWALAAPK | 98      | 727.3809 | 2 | 1452.74   |
| 14    | TAFAAAWALAAPK | 98      | 644.3667 | 2 | 1286.7134 |
| 15    | AAFAEAWALAAPK | 98      | 658.366  | 2 | 1314.7085 |
| 16    | TAFAAAWAALAAK | 98      | 631.3601 | 2 | 1260.6978 |
| 17    | TAFAEAWALAAK  | 98      | 660.3489 | 2 | 1318.7034 |
| 18    | TAFAEAWAALAPK | 98      | 673.3563 | 2 | 1344.719  |
| 19    | AAFAEYWALAAPK | 98      | 704.3668 | 2 | 1406.7346 |
| 20    | TAFAEYWAALAPK | 98      | 719.3831 | 2 | 1436.7451 |
| 21    | AAFAAYWALAAK  | 98      | 662.3675 | 2 | 1322.7134 |
| 22    | TAFAEYWAALAAK | 98      | 706.3785 | 2 | 1410.7295 |
| 23    | TSFAAAWALLAPK | 98      | 673.3871 | 2 | 1344.7554 |
| 24    | TSFAAYWALLAAK | 98      | 706.3895 | 2 | 1410.7659 |
| 25    | TAFAEAWNLLAAK | 98      | 702.8884 | 2 | 1403.7561 |
| 26    | AAFAEAWALLAPK | 98      | 679.3875 | 2 | 1356.7554 |
| 27    | TAFAEAWALLSPK | 98      | 702.3924 | 2 | 1402.7607 |
| 28    | TAFAAAWALLSAK | 98      | 660.3813 | 2 | 1318.7397 |
| 29    | TAFAEYWALLAAK | 98      | 727.3877 | 2 | 1452.7766 |
| 30    | TAFAEAWALLAPK | 98      | 694.3824 | 2 | 1386.7659 |

**Supplementary Table 3.** Table of identified sequences in the quality control. The first 30 sequences were shown.

## 2.2 Preparation of HA tag-based combinatorial alanine library

Wide type sequence: YPYDVDPDYA

Library design:  $(X)_9(\beta\text{-Ala})\text{K-CONH}_2$  (X = WT or Ala)

Library size: 256

### **Split-and-pool synthesis:**

#### **Coupling**

200 mg of 130  $\mu\text{m}$  TentaGel resin (0.26 mmol/g, 0.052 mmol, 782770 beads/g,  $1.57 \times 10^8$  beads) was placed in a 5 mL Torviq fritted syringe. After swelling in DMF for 10 min, the resin was then washed with DMF (3x). Fmoc-Rink amide linker (140 mg, 0.26 mmol, 5.0 equiv) was dissolved in 0.38 M HATU solution in DMF (0.65 mL, 0.25 mmol), activated with DIEA (63  $\mu\text{L}$ , 0.36 mmol, 6.9 equiv). The mixture was sonicated briefly, transferred to the fritted syringe containing the resin, and allowed to stir for 20 minutes. After the coupling solution was drained, the resin was washed with DMF (3x). Fmoc deprotection was achieved by soaking the resin with 20% piperidine in DMF (v/v) (3 mL) for 5 min and this step was repeated twice. The resulting resin was then washed with DMF (3x). A sequential Fmoc-Lys(Boc)-OH coupling and Fmoc- $\beta$ -Ala-OH were performed in the same manner.

#### **Portioning:**

The peptidyl resin was suspended in DMF (6 mL), homogenized, then evenly divided among two 10 mL Torviq fritted syringes. After draining DMF from the syringes, the couplings were carried out as following: Fmoc-protected WT amino acid and Fmoc-Ala-OH (0.13 mmol) were separately dissolved in 0.38 M HATU (0.33 mL, 0.13 mmol), activated with DIEA (32  $\mu\text{L}$ , 0.18 mmol). Each of the activated amino acids was added to the individual resin-containing syringes (~100 mg, 0.026 mmol). After coupling for 20 min, the coupling solutions were drained, and the resin was washed with DMF (3x). Then, all portions of peptidyl resin were combined and washed with DMF. Fmoc deprotection was achieved by treating the resin with 20% piperidine in DMF (3 mL, 5 min batch treatment) and this step was repeated twice. The resulting resin was then washed with DMF (3x). Nine cycles of split-and-pool synthesis were performed using this procedure.

#### **Cleavage from resin and global side chain deprotection:**

The library was cleaved from resin and globally deprotected by treating the peptidyl resin with a cleavage cocktail containing 94% TFA, 2.5% EDT, 2.5% water, and 1.0% TIPS (v/v), for 1 h at ambient temperature. TFA was removed under a gentle stream of nitrogen gas, and the crude peptide was precipitated by the addition of cold

Et<sub>2</sub>O (-80 °C). After centrifugation at 3220 rcf for 3 min, the supernatant was removed, and the precipitated peptide was triturated three times with cold Et<sub>2</sub>O. The resulting material was dissolved in 50% MeCN in water with 0.1% TFA, and lyophilized.

#### **Solid phase extraction:**

The library (30 mg) was dissolved in 3.0 mL of 5% MeCN in water with 0.1% TFA. 6 mL Bond Elut C18 cartridge (Agilent, P/N 12256130) was used for the solid phase extraction. A cartridge was conditioned with MeCN with 0.1% TFA (~10 mL), and then equilibrated with 1% MeCN in water with 0.1% TFA (~10 mL). Afterward the library solution was loaded, and the cartridge was washed with 1% MeCN in water with 0.1% TFA (~10 mL). Sample elution was achieved by passing 70% MeCN in water with 0.1% TFA (~10 mL) through the cartridge. The final eluate was collected and lyophilized.

#### **Quality control:**

20 mg resin was weighed out, cleaved and analyzed by LC-MS/MS (20 mg loaded resin should theoretically contain 14 unique peptides;  $14 = \text{number of beads} / \text{copies of each peptide}$ , number of beads = 7826, copies of peptide = number of total beads / library size =  $1.5 \times 10^5 \text{ beads} / 256 = 585$ ). 25 unique peptide sequences were identified. The library passes the quality control if the amino acid percentage at each position was equally distributed.

### **2.3 Preparation of 14-3-3 binder-based combinatorial alanine library**

Wide type sequence: Cha Cha β-Ser Orn pSer Nph β-Ser β-Ser Nph

Library design: (X)<sub>9</sub>K-CONH<sub>2</sub> (X = WT or Ala)

Abbreviations: Cha, cyclohexyl alanine; β-Ser, beta-homoserine; Orn, ornithine; Nph, 4-nitro-phenylalanine; pSer, phosphoserine. (b = Cha, T = β-Ser, c = Orn, d = pSer, e = Nph).

#### **Split-and-pool synthesis:**

##### **Coupling:**

200 mg of 130 μm TentaGel resin (0.26 mmol/g, 0.05 mmol, 782770 beads/g,  $3.91 \times 10^4$  beads) was placed in a 5 mL Torviq fritted syringe. After swelling in DMF for 10 min, the resin was then washed with DMF (3x). Fmoc-Rink amide linker (268 mg, 0.50 mmol, 10.0 equiv) was dissolved in 0.38 M HATU solution in DMF (1.19 mL, 0.45 mmol, 9.0 equiv), activated with DIEA (260 μL, 1.5 mmol, 30.0 equiv). The mixture was sonicated briefly, transferred to the fritted syringe containing the resin, and allowed to stir for 20 minutes. After the coupling solution was drained, the resin was washed with

DMF (3x). Fmoc deprotection was achieved by soaking the resin with 20% piperidine in DMF (4 mL) for 5 min and this step was repeated twice. The resulting resin was then washed with DMF (3x). A sequential Fmoc-Lys(Boc)-OH coupling, Fmoc removal and DMF washes were performed in the same manner.

**Portioning:**

The peptidyl resin was suspended in DMF (6 mL), homogenized, then evenly divided among two 10 mL Torviq fritted syringes. After draining DMF from the syringes, the couplings were carried out as follows: Fmoc-protected WT amino acid and Fmoc-Ala-OH (0.5 mmol, 10.0 equiv.) were separately dissolved in 0.38 M HATU (0.59 mL, 0.22 mmol), activated with DIEA (130  $\mu$ L, 0.75 mmol). Each of the activated amino acids was added to the individual resin-containing syringes (~100 mg, 0.025 mmol). After coupling for 20 min, the coupling solutions were drained, and the resin was washed with DMF (3x). Then, all portions of peptidyl resin were combined and washed with DMF. Fmoc deprotection was achieved by treating the resin with 20% piperidine in DMF (3 mL, 5 min batch treatment) and this step was repeated twice. The resulting resin was then washed with DMF (3x). Twelve cycles of split-and-pool synthesis were performed using this procedure.

**Cleavage from resin and global side chain deprotection:**

The library was cleaved from resin and globally deprotected by treating the peptidyl resin with a cleavage cocktail containing 94% TFA, 2.5% EDT, 2.5% water, and 1.0% TIPS (v/v), for 1 h at ambient temperature. TFA was removed under a gentle stream of nitrogen gas, and the crude peptide was precipitated by the addition of cold Et<sub>2</sub>O (-80 °C). After centrifugation at 3220 rcf for 3 min, the supernatant was removed, and the precipitated peptide was triturated three times with cold Et<sub>2</sub>O. The resulting material was dissolved in 50% MeCN in water with 0.1% TFA, and lyophilized.

**Solid phase extraction:**

The library (~20 mg) was dissolved in 5 mL of 5% MeCN in water with 0.1% TFA. 6 mL Bond Elut C18 cartridge (Agilent, P/N 12256130) was used for the solid phase extraction. A cartridge was conditioned with MeCN with 0.1% TFA (5 mL), and then equilibrated with 1% MeCN in water with 0.1% TFA (5 mL). Next, the library solution was loaded, and the cartridge was washed with 1% MeCN in water with 0.1% TFA (5 mL). Sample elution was done by 70% MeCN in water with 0.1% TFA (5 mL). The eluted fraction was collected and lyophilized.

**Quality control:**

20 mg resin was weighed out, cleaved and analyzed by LC-MS/MS (20 mg loaded resin should theoretically contained 27 unique peptides; 27 = number of beads / copies

of each peptide, number of beads = 7826, copies of peptide = number of total beads / library size =  $1.5 \times 10^5$  beads / 512 = 293). 39 unique peptide sequences were identified. The library passes the quality control if the amino acid percentage at each position was equally distributed.

### 3. Supplementary Methods 2: In-solution affinity selection of combinatorial alanine library

#### 3.1 Method for HPSEC-based in-solution affinity selection

High-performance size exclusion chromatography (HPSEC) was carried out using an Agilent 1260 Infinity II LC System with the Agilent BIOSEC-3 HPLC column (7.8 x 150 mm, 3  $\mu$ m particle size, 100 Å pore size). HPSEC samples, such as proteins, libraries, or protein-library mixtures (30 min incubation at 4 °C), were prepared in 100  $\mu$ L buffer, and then eluted in buffered mobile phase at 1 mL/min flow rate for 15 min. While performing affinity selection experiments, the protein-binder complex fraction was detected by UV (214 and 280 nm) and collected. Prior to the LC-MS/MS-based *de novo* peptide sequencing, the protein-binder fraction was lyophilized. After the HPSEC affinity selection experiments, SEC column was cleaned with an IPA/water/MeCN/MeOH (1:1:1:1, v/v) mixture containing 0.1% formic acid (FA).

#### 3.2 Method for *de novo* peptide sequencing

The lyophilized sample was dissolved in 50  $\mu$ L water containing 0.2% FA and 10% trichloroacetic acid (TCA), and then subjected to LC-MS/MS using an Agilent 6550 quadrupole time-of-flight LC-MS with an Agilent Zorbax 300SB C3 column (2.1 x 150 mm, 5  $\mu$ m particle size, 300 Å pore size). Mobile phases were water with 0.1% FA (solvent A) and MeCN with 0.1% FA (solvent B). A linear gradient of 1% B to 61% B (34 min, flow rate: 0.5 mL/min) was used to perform liquid chromatography. Absolute MS/MS threshold was typically set to 1500 counts and selected precursor ions had 2+ and 3+ charges. MS/MS spectra were imported and analyzed using PEAKS Studio software from Bioinformatics Solutions.

#### 3.3 Affinity selection against MDM2

##### 3.3.1 Selection conditions

| Condition <sup>a</sup> | MDM2               | Library     | per member <sup>b</sup> |
|------------------------|--------------------|-------------|-------------------------|
| <b>A</b>               | 1 nmol, 23 $\mu$ g | 4 $\mu$ g   | 1 ng                    |
| <b>B1, B2, B3</b>      | 1 nmol, 23 $\mu$ g | 500 $\mu$ g | 122 ng                  |

**MDM2 affinity selection condition.** <sup>a</sup>Library was incubated with MDM2 in 1x PBS (total volume: 100  $\mu$ L) for 30 min in 4 °C before the HPSEC-based affinity selection.

<sup>b</sup>Amount of each library member: amount of library divided by library diversity.

### 3.3.2 Identified sequences from condition A

The selection was replicated five times. The following list combined results from five repetitions.

| Entry | Compound name | Sequence       | ALC (%) | <i>m/z</i> | <i>z</i> | Mass      | <i>K<sub>D</sub></i> (nM) | Mass error (ppm) | RT (min) |
|-------|---------------|----------------|---------|------------|----------|-----------|---------------------------|------------------|----------|
| 1     | 17            | TSFAEYWAALSPK  | 95      | 735.3814   | 2        | 1468.7351 | 31.5 ± 4.2                | 1.3              | 15.51    |
| 2     | 18            | TSFAEYWNALSAK  | 98      | 743.8728   | 2        | 1485.7251 | 2.9 ± 1.6                 | 0.6              | 15.81    |
| 3     | 19            | TSFAEYWNALAPK  | 99      | 748.8862   | 2        | 1495.7458 | 8.8 ± 1.9                 | 0.4              | 15.93    |
| 4     | 20            | TSFAEYWNALAAK  | 99      | 735.8782   | 2        | 1469.7302 | 6.2 ± 1.8                 | 1.1              | 15.07    |
| 5     | 21            | ASFAEYWAALSPK  | 99      | 720.3765   | 2        | 1438.7244 | 2.0 ± 1.8                 | -0.6             | 15.65    |
| 6     | 22            | TSFAEYWAALSAK  | 99      | 722.3726   | 2        | 1442.7195 | 4.9 ± 2.7                 | -2.1             | 15.78    |
| 7     | 23            | TAF AEYWNALSAK | 99      | 735.8763   | 2        | 1469.7302 | 3.7 ± 1.5                 | 0.1              | 16.13    |
| 8     | 24            | ASFAEYWAALAPK  | 99      | 712.3774   | 2        | 1422.7295 | 59.3 ± 11.6               | 4.1              | 15.2     |
| 9     | 25            | TSFAAYWAALSAK  | 85      | 693.3683   | 2        | 1384.7139 | 2.2 ± 0.8                 | 3.9              | 15.24    |
| 10    | 26            | TAF AEYWAALSAK | 94      | 714.3749   | 2        | 1426.7244 | 1.0 ± 1.0                 | -1               | 16.26    |
| 11    | 27            | AAFAEYWAALSPK  | 96      | 712.3769   | 2        | 1422.7295 | 9.9 ± 3.3                 | 2.9              | 16.52    |
| 12    | 28            | ASFAEYWNALAAK  | 92      | 720.8735   | 2        | 1439.7197 | 4.7 ± 1.5                 | -0.5             | 15.9     |
| 13    | 29            | ASFAEYWAALAAK  | 93      | 699.3627   | 2        | 1396.703  | 2.3 ± 1.2                 | -1.2             | 16.6     |
| 14    | 30            | ASFAAYWAALSAK  | 98      | 678.3644   | 2        | 1354.7034 | 1.9 ± 1.9                 | -0.8             | 15.94    |
| 15    | 31            | AAFAEYWNALAAK  | 95      | 712.8754   | 2        | 1423.7249 | 3.2 ± 2.6                 | 2.4              | 15.53    |
| 16    | 32            | TAF AEYWAALAAK | 99      | 677.3744   | 2        | 1352.7241 | 3.4 ± 2.1                 | 1.4              | 16.68    |
| 17    | 33            | ASFAAYWAALAAK  | 95      | 670.3667   | 2        | 1338.7085 | 67.8 ± 14.4               | -0.7             | 16.78    |
| 18    | 34            | AAFAAYWAALAAK  | 97      | 662.3692   | 2        | 1322.7134 | 4.7 ± 2.4                 | 0                | 16.50    |
| 19    |               | TSFAEYWAALAPK  | 99      | 727.3827   | 2        | 1452.74   |                           | 0.2              | 15.11    |
| 20    |               | TSFAEYWNALSPK  | 98      | 756.883    | 2        | 1511.741  |                           | -2.7             | 16.43    |
| 21    |               | TSFAAYWAALSPK  | 96      | 706.3765   | 2        | 1410.7295 |                           | -0.5             | 15.78    |
| 22    |               | TSFAEYWNLLSAK  | 95      | 764.9009   | 2        | 1527.7722 |                           | 2.2              | 16.84    |
| 23    |               | ASFAEYWNALSPK  | 94      | 741.8788   | 2        | 1481.7302 |                           | 0.7              | 15.3     |
| 24    |               | ASFAEYWNALAPK  | 94      | 733.8811   | 2        | 1465.7354 |                           | 2.2              | 16.84    |
| 25    |               | TSFAAYWNALSAK  | 93      | 714.8728   | 2        | 1427.7197 |                           | -1.9             | 15.82    |
| 26    |               | ASFAAYWNALSAK  | 81      | 699.8665   | 2        | 1397.7092 |                           | 0.4              | 15.93    |

**Identified sequences from MDM2 affinity selection condition A.** Sequences were enriched from MDM2 affinity selection condition A with high average local confidence (ALC > 80). Peptides selected for resynthesizing and validation were given a compound number. Binding dissociation constant *K<sub>D</sub>* was determined by BLI competition assay. RT = retention time.

### 3.3.3 Identified sequences from condition B

The selection was replicated for three times. On average, 79 unique sequences were identified. Selections with 73, 73, 90 unique identified sequences are listed.

| Entry | Peptide       | ALC (%) | <i>m/z</i> | <i>z</i> | Mass      | RT<br>(min) | Mass<br>error<br>(ppm) |
|-------|---------------|---------|------------|----------|-----------|-------------|------------------------|
| 1     | TSFAEYWAALSPK | 99      | 735.3752   | 2        | 1468.7351 | 13.91       | -1                     |
| 2     | ASFAEYWAALAPK | 99      | 712.3723   | 2        | 1422.7295 | 15.68       | 0.6                    |
| 3     | TSFAEYWAALAPK | 99      | 727.3778   | 2        | 1452.74   | 16.01       | 0.3                    |
| 4     | TSFAEYWALLSAK | 99      | 736.3823   | 2        | 1470.7507 | 16.04       | 0.7                    |
| 5     | TSFAEYWNALSAK | 99      | 743.8708   | 2        | 1485.7251 | 16.21       | -0.4                   |
| 6     | TAAAAAWALLAAK | 99      | 614.3632   | 2        | 1226.7136 | 15.15       | 1.4                    |
| 7     | TSFAEYWNALAAK | 99      | 735.8717   | 2        | 1469.7302 | 15.19       | -1.5                   |
| 8     | AAFAEYWAALSAK | 99      | 699.3636   | 2        | 1396.7139 | 15.62       | -0.9                   |
| 9     | AAFAAYWNAAAAK | 98      | 662.8452   | 2        | 1323.6724 | 15.72       | -0.9                   |
| 10    | AAFAAYWAAAAPK | 98      | 662.3447   | 2        | 1322.677  | 12.51       | 2.7                    |
| 11    | ASFAEYWAAAAPK | 98      | 691.3486   | 2        | 1380.6826 | 12.9        | -1.6                   |
| 12    | TSFAEYWNALSPK | 98      | 749.8688   | 2        | 1497.7251 | 13.52       | 0.1                    |
| 13    | ASFAEYWNALAAK | 98      | 713.8593   | 2        | 1425.7041 | 14.05       | -1.3                   |
| 14    | ASFAEYWAALSPK | 98      | 713.3624   | 2        | 1424.7087 | 14.34       | -0.1                   |
| 15    | TSFAEYWAALSAK | 98      | 715.3613   | 2        | 1428.7036 | 14.46       | -1.6                   |
| 16    | ASFAEYWNALSPK | 98      | 741.8723   | 2        | 1481.7302 | 14.68       | 1.1                    |
| 17    | ASFAEYWNALAPK | 98      | 733.8743   | 2        | 1465.7354 | 14.97       | 3.5                    |
| 18    | AAFAEYWAALSPK | 98      | 712.3712   | 2        | 1422.7295 | 14.93       | 3.1                    |
| 19    | TSFAEYWNALAPK | 98      | 748.8795   | 2        | 1495.7458 | 14.92       | -0.1                   |
| 20    | ASFAEYWAALAAK | 98      | 692.3597   | 2        | 1382.6982 | 14.99       | -1.5                   |
| 21    | TSFAEYWNLLSAK | 98      | 764.8924   | 2        | 1527.7722 | 15.23       | -0.9                   |
| 22    | AAFAEYWNALSAK | 98      | 720.8658   | 2        | 1439.7197 | 15.32       | -1.1                   |
| 23    | TAFAYWAALSAK  | 98      | 714.3677   | 2        | 1426.7244 | 15.32       | -0.9                   |
| 24    | AAFAAAWNLLAAK | 98      | 658.8769   | 2        | 1315.74   | 15.62       | 4.7                    |
| 25    | TSFAEYWNLLSPK | 98      | 777.9005   | 2        | 1553.7878 | 15.68       | 1.6                    |
| 26    | ASFAEYWNALSAK | 98      | 721.8557   | 2        | 1441.699  | 16.31       | -1.3                   |
| 27    | AAFAAAWAALAAK | 98      | 609.342    | 2        | 1216.6716 | 14.38       | -1.8                   |
| 28    | TSFAEYWAALAAK | 98      | 707.3628   | 2        | 1412.7087 | 15.51       | -2.5                   |
| 29    | ASFAEYWALLSAK | 98      | 721.377    | 2        | 1440.74   | 15.74       | -0.6                   |
| 30    | TSFAEAWAALAPK | 97      | 681.3595   | 2        | 1360.7139 | 15.75       | 1.7                    |
| 31    | ASFAAYWAALSAK | 97      | 678.3594   | 2        | 1354.7034 | 16.57       | -1                     |
| 32    | ASFAEYWAALSAK | 97      | 707.3636   | 2        | 1412.7087 | 14.13       | -1.5                   |

|    |                 |    |          |   |           |       |      |
|----|-----------------|----|----------|---|-----------|-------|------|
| 33 | AAAAEYWAALAAK   | 97 | 653.3528 | 2 | 1304.6877 | 14.97 | -1.7 |
| 34 | TAF AEYWNALSAK  | 97 | 735.8715 | 2 | 1469.7302 | 16.04 | 1.6  |
| 35 | TSFAAYWAALSAK   | 97 | 693.3629 | 2 | 1384.7139 | 16.62 | -0.4 |
| 36 | ASFAEYWAAAAPK   | 97 | 699.3471 | 2 | 1396.6775 | 14.34 | -1.4 |
| 37 | AAAAAYWALAAAK   | 97 | 624.3459 | 2 | 1246.6821 | 15.38 | -6.9 |
| 38 | ASAAAYWAALAPK   | 97 | 645.3525 | 2 | 1288.6929 | 15.65 | 0.7  |
| 39 | AAFAAAWALAAAK   | 97 | 616.3502 | 2 | 1230.6873 | 15.6  | 2.7  |
| 40 | TSFAEYWNLLAAK   | 97 | 749.8883 | 2 | 1497.7615 | 13.74 | 2.6  |
| 41 | ASFAEYWNLLSAK   | 97 | 749.8866 | 2 | 1497.7615 | 14.69 | -1.2 |
| 42 | AAAAAYWAALAPK   | 96 | 637.3564 | 2 | 1272.6978 | 15.53 | -1.9 |
| 43 | AAFAEYWNALAAK   | 96 | 705.8611 | 2 | 1409.7092 | 13.39 | 1.6  |
| 44 | AAFAEYWAALAPK   | 96 | 697.3643 | 2 | 1392.719  | 13.76 | -3.9 |
| 45 | TAF AEYWAALSPK  | 96 | 727.3778 | 2 | 1452.74   | 13.97 | -1.9 |
| 46 | AAFAAYALLAAK    | 96 | 625.8669 | 2 | 1249.7183 | 15.28 | -1.2 |
| 47 | AAFAAYWAAAAPK   | 96 | 647.3444 | 2 | 1292.6665 | 16.33 | 0.4  |
| 48 | AAAAAAWALLAAK   | 96 | 599.3575 | 2 | 1196.7029 | 16.65 | -1.9 |
| 49 | AAFAEYWALAAPK   | 96 | 704.3736 | 2 | 1406.7346 | 13.29 | 0.5  |
| 50 | ASFAAAWALAAK    | 95 | 617.3406 | 2 | 1232.6665 | 14.19 | -1.1 |
| 51 | AAAAAYWALAAPK   | 95 | 637.3544 | 2 | 1272.6978 | 15.1  | -3.5 |
| 52 | ASFAEYWNLASAK   | 95 | 721.8559 | 2 | 1441.699  | 15.47 | -0.5 |
| 53 | ASFAAYWNALSAK   | 95 | 699.8611 | 2 | 1397.7092 | 15.5  | 0.7  |
| 54 | TSFAAYWNALSAK   | 95 | 714.8654 | 2 | 1427.7197 | 15.15 | 0.8  |
| 55 | TSFAAYWAALSPK   | 95 | 706.3705 | 2 | 1410.7295 | 12.98 | 6    |
| 56 | TSFAEYWALLSPK   | 95 | 749.3895 | 2 | 1496.7664 | 14.88 | -2   |
| 57 | AAAAAYWALASAK   | 95 | 632.3438 | 2 | 1262.677  | 15.45 | -1.4 |
| 58 | ASFAAYWAALSPK   | 95 | 691.3661 | 2 | 1380.719  | 14.52 | 0.2  |
| 59 | AAFAEYWNALAPK   | 94 | 725.8757 | 2 | 1449.7405 | 13.26 | -2.7 |
| 60 | TSAAA WALLAAK   | 94 | 622.3607 | 2 | 1242.7085 | 13.8  | -1.2 |
| 61 | TAF AA WAAALAPK | 94 | 644.3613 | 2 | 1286.7134 | 14.78 | -1.2 |
| 62 | AAFAEYWAALAAK   | 93 | 691.3661 | 2 | 1380.719  | 14.73 | -2.5 |
| 63 | AAAAEYWALLAAK   | 93 | 667.3655 | 2 | 1332.719  | 14.97 | -2.3 |
| 64 | AAFAEYWNLASPK   | 92 | 733.8737 | 2 | 1465.7354 | 15.61 | -2.2 |
| 65 | ASFAEAWALLAAK   | 92 | 667.3688 | 2 | 1332.719  | 16.4  | -1.3 |
| 66 | ASFAAYAALLAAK   | 91 | 633.8636 | 2 | 1265.7131 | 12.94 | -3.2 |
| 67 | TSFAAYWAALAAK   | 91 | 685.3677 | 2 | 1368.719  | 15.02 | -1.3 |
| 68 | AAFAAYWAALSAK   | 91 | 670.3555 | 2 | 1338.7085 | 15.98 | -0.9 |
| 69 | AAFAEYWAAAAAK   | 91 | 670.3434 | 2 | 1338.6721 | 14.92 | 0    |
| 70 | TAF AEYWAALAAK  | 91 | 706.371  | 2 | 1410.7295 | 14.91 | -2.5 |

|    |               |    |          |   |           |       |      |
|----|---------------|----|----------|---|-----------|-------|------|
| 71 | AAFAEYWNALSPK | 89 | 733.874  | 2 | 1465.7354 | 16.5  | 0.6  |
| 72 | AAFAAYWAAASAK | 89 | 642.3295 | 2 | 1282.6458 | 14.83 | -1.3 |
| 73 | ASFAAAWAALSAK | 88 | 632.3445 | 2 | 1262.677  | 15.63 | -4.2 |
| 74 | ASFAEYWNAAAAK | 87 | 699.844  | 2 | 1397.6729 | 16.08 | -1   |
| 75 | AAAAAYWNLLSAK | 87 | 667.8634 | 2 | 1333.7144 | 15.13 | 1.3  |
| 76 | TAFAEYWAALAPK | 87 | 719.3804 | 2 | 1436.7451 | 14.86 | -1.9 |
| 77 | TAAAAAWAALAAK | 86 | 593.34   | 2 | 1184.6665 | 14.5  | -1.8 |
| 78 | TSAAEYWNLLAPK | 86 | 731.8821 | 2 | 1461.7615 | 15.14 | -1.7 |
| 79 | TAFAEYWNALSPK | 84 | 748.8786 | 2 | 1495.7458 | 16.32 | 3    |
| 80 | ASAAAYWALAAK  | 82 | 632.343  | 2 | 1262.677  | 15.19 | -0.3 |
| 81 | TAFAAAWNALAAK | 81 | 652.8569 | 2 | 1303.7036 | 16.37 | 1.4  |
| 82 | AAAAAYWAALSAK | 81 | 625.3373 | 2 | 1248.6614 | 16.53 | -0.2 |
| 83 | AAAAAYWAALSPK | 79 | 645.347  | 2 | 1288.6929 | 13.8  | 1.5  |
| 84 | AAFAEYWNLASAK | 78 | 720.8655 | 2 | 1439.7197 | 15.33 | -9   |
| 85 | ASFAAAWALLAPK | 78 | 651.3713 | 2 | 1300.7292 | 14.19 | 0.1  |
| 86 | ASFAAAWAALAPK | 76 | 637.3546 | 2 | 1272.6978 | 16.68 | -1.5 |
| 87 | TAFAEYWNALAAK | 75 | 727.8723 | 2 | 1453.7354 | 14.39 | -4.4 |
| 88 | ASFAEAWAALSAK | 75 | 661.3501 | 2 | 1320.6826 | 14.53 | -1.3 |
| 89 | AAAAAYWNALAAK | 74 | 645.8525 | 2 | 1289.688  | 12.67 | -1.1 |
| 90 | ASAAAYWNLLAPK | 72 | 680.8703 | 2 | 1359.73   | 14.34 | -0.3 |

**Identified sequences from MDM2 affinity selection condition B1. (ALC >70)**

RT = retention time.

| Entry | Peptide       | ALC (%) | m/z      | z | Mass      | RT (min) | Mass error (ppm) |
|-------|---------------|---------|----------|---|-----------|----------|------------------|
| 1     | AAAAAYWAALAAK | 99      | 617.3381 | 2 | 1232.6665 | 13.36    | -4               |
| 2     | AAAAAYWALAAK  | 99      | 624.343  | 2 | 1246.6821 | 13.68    | -8.6             |
| 3     | TSFAEYWAALAPK | 99      | 727.3776 | 2 | 1452.74   | 16.53    | 0.4              |
| 4     | AAAAAYWAALSAK | 98      | 632.3411 | 2 | 1262.677  | 13.11    | -7.5             |
| 5     | AAFAAYWAAAAPK | 98      | 654.3472 | 2 | 1306.6821 | 13.61    | -1.8             |
| 6     | ASFAAYWAAAAPK | 98      | 662.3434 | 2 | 1322.677  | 13.89    | -3.6             |
| 7     | TSFAEYWAAAAPK | 98      | 706.3522 | 2 | 1410.6931 | 13.93    | -2.3             |
| 8     | TSFAEYWNALAPK | 98      | 748.8783 | 2 | 1495.7458 | 15.56    | -2.5             |
| 9     | AAFAAYWAALSPK | 98      | 683.3693 | 2 | 1364.7241 | 15.64    | 0                |
| 10    | TSFAEYWNALAAK | 98      | 735.8724 | 2 | 1469.7302 | 15.65    | 0                |
| 11    | AAFAAYWAALSAK | 98      | 670.3605 | 2 | 1338.7085 | 15.74    | -1.6             |
| 12    | ASAAAYWAALAAK | 97      | 625.3362 | 2 | 1248.6614 | 13.38    | -2.9             |

|    |                |    |          |   |           |       |      |
|----|----------------|----|----------|---|-----------|-------|------|
| 13 | TSFAEYWNALSAK  | 97 | 743.867  | 2 | 1485.7251 | 15.12 | -3.8 |
| 14 | TSFAEYWNALSPK  | 97 | 756.8762 | 2 | 1511.741  | 15.19 | -2.1 |
| 15 | TSFAAYWNALAAK  | 97 | 706.8688 | 2 | 1411.7249 | 15.56 | -1.2 |
| 16 | AAFAEYWAALSAK  | 97 | 699.3644 | 2 | 1396.7139 | 15.7  | 0.3  |
| 17 | AAAAAYWNLLAAK  | 96 | 659.8677 | 2 | 1317.7192 | 14.09 | 1.3  |
| 18 | AAFAAYWNALSAK  | 96 | 684.8502 | 2 | 1367.6985 | 14.25 | -9.2 |
| 19 | AAFAAYWNALSPK  | 96 | 704.8688 | 2 | 1407.73   | 14.95 | -5   |
| 20 | ASFAEYWAALSPK  | 96 | 713.36   | 2 | 1424.7087 | 15    | -2.3 |
| 21 | AAFAEYWAALAPK  | 96 | 697.3643 | 2 | 1392.719  | 15.41 | -3.5 |
| 22 | ASFAEYWNALAPK  | 96 | 733.8726 | 2 | 1465.7354 | 15.58 | -3.2 |
| 23 | AAFAEYWAALSPK  | 96 | 712.3723 | 2 | 1422.7295 | 15.59 | 0.3  |
| 24 | ASFAAYWAALAPK  | 96 | 683.3708 | 2 | 1364.7241 | 15.94 | 0.9  |
| 25 | AAAAAYWNLLAPK  | 95 | 679.8798 | 2 | 1357.7507 | 16.44 | 2.1  |
| 26 | TAF AEYWNALAAK | 95 | 720.8647 | 2 | 1439.7197 | 14.77 | -4.2 |
| 27 | ASFAEYWNALSPK  | 95 | 741.8707 | 2 | 1481.7302 | 14.89 | -3.4 |
| 28 | ASFAEYWAALAAK  | 95 | 692.3508 | 2 | 1382.6982 | 15.21 | -2.2 |
| 29 | ASFAEYWNLLSPK  | 95 | 755.8871 | 2 | 1509.7615 | 15.84 | -8.1 |
| 30 | TAF AEYWAALAPK | 95 | 719.378  | 2 | 1436.7451 | 16.27 | -1.1 |
| 31 | AAFAAYWAAAAAK  | 94 | 634.3331 | 2 | 1266.6509 | 16.29 | -2.6 |
| 32 | ASAAAYWNLLAAK  | 94 | 667.86   | 2 | 1333.7144 | 13.57 | 0.6  |
| 33 | ASFAAYWNALSAK  | 94 | 692.8503 | 2 | 1383.6936 | 14.02 | -6.7 |
| 34 | ASFAEYWNALAAK  | 94 | 713.8553 | 2 | 1425.7041 | 14.16 | -5.4 |
| 35 | AAFAAYWNLASPK  | 94 | 704.8688 | 2 | 1407.73   | 14.61 | -5.7 |
| 36 | TSFAEYWAALSPK  | 94 | 728.3641 | 2 | 1454.7195 | 14.95 | -5   |
| 37 | TAAAAAWALLAAK  | 94 | 614.3604 | 2 | 1226.7136 | 15.07 | -4   |
| 38 | ASFAAYWAALSAK  | 94 | 678.3605 | 2 | 1354.7034 | 15.13 | -6   |
| 39 | TSFAAYWAALSAK  | 94 | 693.3624 | 2 | 1384.7139 | 15.88 | 2.2  |
| 40 | ASFAEYWAALAPK  | 94 | 712.3726 | 2 | 1422.7295 | 15.92 | -2.6 |
| 41 | AAAAAYWALLSPK  | 93 | 659.3653 | 2 | 1316.7241 | 16.42 | 0.8  |
| 42 | TAF AEYWNALSAK | 93 | 735.8701 | 2 | 1469.7302 | 14.28 | -7.3 |
| 43 | TSFAEYWAALSAK  | 93 | 715.3601 | 2 | 1428.7036 | 14.71 | -6.1 |
| 44 | TAF AEYWNALAPK | 93 | 740.883  | 2 | 1479.751  | 14.96 | -3.2 |
| 45 | ASFAAYWNALAPK  | 93 | 704.8707 | 2 | 1407.73   | 15.23 | 1.4  |
| 46 | ASFAAAWNLLAAK  | 93 | 666.8737 | 2 | 1331.7349 | 15.38 | 0.3  |
| 47 | TSFAEYWNLLAAK  | 93 | 749.8869 | 2 | 1497.7615 | 15.44 | -2.3 |
| 48 | ASFAAYWAAASPK  | 92 | 670.3438 | 2 | 1338.6721 | 15.48 | -7.9 |
| 49 | AAFAAAWALLSAK  | 92 | 638.3632 | 2 | 1274.7134 | 16.13 | -1.5 |
| 50 | TAF AAAWNLLSAK | 92 | 681.8802 | 2 | 1361.7456 | 16.31 | -1.5 |

|    |               |    |          |   |           |       |       |
|----|---------------|----|----------|---|-----------|-------|-------|
| 51 | TSFAAYWAALAAK | 92 | 685.3661 | 2 | 1368.719  | 13.49 | 0.6   |
| 52 | AAFAAAWNLLAAK | 91 | 658.8754 | 2 | 1315.74   | 16.11 | -1.3  |
| 53 | TSFAEYWALLSAK | 91 | 736.3832 | 2 | 1470.7507 | 16.19 | 0.3   |
| 54 | TSFAAYWNALSAK | 90 | 714.8643 | 2 | 1427.7197 | 16.76 | -1    |
| 55 | ASFAAYWALASPK | 90 | 691.3682 | 2 | 1380.719  | 16.17 | -2.9  |
| 56 | ASFAAYWAALAAK | 90 | 670.3616 | 2 | 1338.7085 | 16.62 | 0.8   |
| 57 | ASFAEYWNLASPK | 89 | 741.8715 | 2 | 1481.7302 | 15.15 | -4    |
| 58 | AAFAAYWAAASPK | 88 | 662.3378 | 2 | 1322.677  | 15.96 | 2     |
| 59 | AAAAAYWAALAPK | 88 | 637.3521 | 2 | 1272.6978 | 16.74 | 0.1   |
| 60 | TAAAAYWAALAPK | 88 | 652.3594 | 2 | 1302.7085 | 14.67 | -1.2  |
| 61 | ASFAAYWNLAAPK | 88 | 697.8576 | 2 | 1393.7141 | 16.03 | 2.1   |
| 62 | TSFAAYWNALSPK | 88 | 720.8551 | 2 | 1439.7197 | 13.22 | -12.1 |
| 63 | ASAAAYWNLLAPK | 88 | 687.8765 | 2 | 1373.7456 | 13.73 | -6.4  |
| 64 | ASFAAYWAALSPK | 88 | 691.3682 | 2 | 1380.719  | 13.8  | -3.3  |
| 65 | ASFAEYWNLLAAK | 88 | 734.8823 | 2 | 1467.751  | 14.24 | -9.7  |
| 66 | ASFAAAWAALSAK | 87 | 632.343  | 2 | 1262.677  | 14.35 | -9.8  |
| 67 | AAFAAYAALLAAK | 87 | 625.8641 | 2 | 1249.7183 | 14.39 | -16.7 |
| 68 | ASAAAYWALAAK  | 86 | 632.3417 | 2 | 1262.677  | 14.81 | -5.3  |
| 69 | ASFAAYWNALAAK | 86 | 691.8635 | 2 | 1381.7141 | 15.97 | 2     |
| 70 | TSFAAYWAALAPK | 85 | 698.3774 | 2 | 1394.7346 | 16.25 | -0.6  |
| 71 | AAFAEYWAALAAK | 84 | 691.3651 | 2 | 1380.719  | 15.09 | -4.4  |
| 72 | TAFAEYWAALSAK | 82 | 707.3613 | 2 | 1412.7087 | 15.62 | -3.6  |

**Identified sequences from MDM2 affinity selection condition B2 (ALC >70)**

RT = retention time.

| Entry | Peptide       | ALC (%) | <i>m/z</i> | <i>z</i> | Mass      | RT<br>(min) | Mass<br>error<br>(ppm) |
|-------|---------------|---------|------------|----------|-----------|-------------|------------------------|
| 1     | TSFAEYWAALAPK | 99      | 727.3783   | 2        | 1452.74   | 16.46       | 1.4                    |
| 2     | ASAAAYWALAAK  | 98      | 632.3451   | 2        | 1262.677  | 13.65       | -1.1                   |
| 3     | ASFAEYWAAAAPK | 98      | 691.3495   | 2        | 1380.6826 | 13.91       | 1.4                    |
| 4     | ASAAAYWAALAPK | 98      | 645.3535   | 2        | 1288.6929 | 13.94       | -0.3                   |
| 5     | TSFAEYWNALSAK | 98      | 736.8605   | 2        | 1471.7095 | 14.34       | -2                     |
| 6     | TSFAEYWNALAAK | 98      | 728.8646   | 2        | 1455.7146 | 14.85       | 0                      |
| 7     | TSFAEYWAALSAK | 98      | 715.3605   | 2        | 1428.7036 | 15.24       | -1.2                   |
| 8     | TSFAEYWNALSPK | 98      | 756.8768   | 2        | 1511.741  | 15.29       | 2                      |
| 9     | ASFAEYWAALSPK | 98      | 720.3701   | 2        | 1438.7244 | 15.38       | -1.3                   |
| 10    | TSFAEYWAALSPK | 98      | 735.3755   | 2        | 1468.7351 | 15.73       | -0.2                   |

|    |               |    |          |   |           |       |       |
|----|---------------|----|----------|---|-----------|-------|-------|
| 11 | ASFAEYWAALAPK | 98 | 712.3723 | 2 | 1422.7295 | 16    | 0.9   |
| 12 | AAFAAYWAALAAK | 98 | 662.3634 | 2 | 1322.7134 | 16.03 | 1     |
| 13 | TSFAEYWALLSAK | 98 | 736.3837 | 2 | 1470.7507 | 16.38 | 0.3   |
| 14 | AAFAAYWAAASPK | 97 | 662.3444 | 2 | 1322.677  | 16.63 | -0.8  |
| 15 | TAAAAWALLAAK  | 97 | 614.3621 | 2 | 1226.7136 | 16.63 | 1.4   |
| 16 | TSFAEYWNALAPK | 97 | 748.8801 | 2 | 1495.7458 | 13.25 | -2.1  |
| 17 | AAFAAYAALLAAK | 97 | 625.8654 | 2 | 1249.7183 | 15.24 | -3.3  |
| 18 | ASFAEYWAALSAK | 97 | 707.3629 | 2 | 1412.7087 | 15.71 | -0.2  |
| 19 | TSFAEYWNLLSAK | 97 | 764.8933 | 2 | 1527.7722 | 15.66 | -1.7  |
| 20 | AAFAAYWNAAAAK | 96 | 662.8416 | 2 | 1323.6724 | 16.08 | 1.8   |
| 21 | AAAAAYWALAAK  | 96 | 624.3488 | 2 | 1246.6821 | 16.72 | -0.1  |
| 22 | AAFAEYWAAAAAK | 96 | 670.3434 | 2 | 1338.6721 | 12.9  | -2.9  |
| 23 | ASFAEYWAALAAK | 96 | 692.3596 | 2 | 1382.6982 | 13.79 | 0.8   |
| 24 | TAFAYWAALSAK  | 96 | 685.3663 | 2 | 1368.719  | 14.21 | 0.2   |
| 25 | ASFAEYWNALSAK | 95 | 721.8554 | 2 | 1441.699  | 16.02 | 4.7   |
| 26 | AAFAAAWAALAAK | 95 | 609.3421 | 2 | 1216.6716 | 16.02 | -0.6  |
| 27 | AAFAEYWAALSAK | 95 | 699.3657 | 2 | 1396.7139 | 14.2  | -1.9  |
| 28 | TAFAYWAALSAK  | 95 | 714.3693 | 2 | 1426.7244 | 15.03 | -1.6  |
| 29 | AAFAEYWAALAPK | 95 | 704.3668 | 2 | 1406.7346 | 15.24 | 1.8   |
| 30 | AAFAAAWNLLAAK | 95 | 658.8762 | 2 | 1315.74   | 15.75 | 2.2   |
| 31 | AAFAAYWAALAPK | 95 | 675.3718 | 2 | 1348.7292 | 16.02 | -0.2  |
| 32 | AAAAAYWAALAPK | 94 | 637.356  | 2 | 1272.6978 | 16.18 | -0.9  |
| 33 | TAFAYWNALSAK  | 94 | 735.8719 | 2 | 1469.7302 | 16.15 | -11.1 |
| 34 | TSFAAYWNALAAK | 94 | 706.8693 | 2 | 1411.7249 | 16.2  | -1.7  |
| 35 | AAFAAYWAALSAK | 94 | 670.3616 | 2 | 1338.7085 | 16.22 | -0.1  |
| 36 | TSFAEYWNLLAAK | 94 | 749.8884 | 2 | 1497.7615 | 13.74 | -0.3  |
| 37 | AAFAAYWNALSAK | 93 | 691.8629 | 2 | 1381.7141 | 15.09 | -0.7  |
| 38 | AAFAEYWNALAAK | 93 | 712.8685 | 2 | 1423.7249 | 15.45 | 0     |
| 39 | ASFAEYWNALSPK | 93 | 741.8715 | 2 | 1481.7302 | 15.67 | -0.6  |
| 40 | TAFAYWNALAPK  | 93 | 740.8812 | 2 | 1479.751  | 15.89 | 0.1   |
| 41 | ASFAEYWNALAAK | 93 | 720.868  | 2 | 1439.7197 | 16.33 | 0.5   |
| 42 | TAFAAWNLLSAK  | 93 | 681.8788 | 2 | 1361.7456 | 14.95 | -2.1  |
| 43 | AAFAAYWAAASAK | 92 | 642.3296 | 2 | 1282.6458 | 15.24 | -1.7  |
| 44 | TAAAYWALASAK  | 92 | 647.3498 | 2 | 1292.6877 | 15.33 | -1.3  |
| 45 | AAFAEYWAALSPK | 92 | 712.3741 | 2 | 1422.7295 | 15.43 | -1.8  |
| 46 | ASFAAYWAALSAK | 92 | 678.3596 | 2 | 1354.7034 | 15.46 | -2.1  |
| 47 | TSFAAYWAALAAK | 92 | 685.3661 | 2 | 1368.719  | 15.69 | 1.2   |
| 48 | TSFAEYWAALAAK | 92 | 714.3695 | 2 | 1426.7244 | 16.27 | -1.8  |

|    |               |    |          |   |           |       |      |
|----|---------------|----|----------|---|-----------|-------|------|
| 49 | TSFAAYWNALSAK | 91 | 707.8601 | 2 | 1413.7041 | 12.76 | -0.9 |
| 50 | ASFAAYWNALSPK | 91 | 705.8607 | 2 | 1409.7092 | 13.06 | -2.1 |
| 51 | AAAAAYWNLLSPK | 91 | 687.8792 | 2 | 1373.7456 | 14.74 | 3.1  |
| 52 | ASFAEYWNALAPK | 91 | 733.8737 | 2 | 1465.7354 | 15.67 | 3    |
| 53 | AAFAEYWNLAALK | 90 | 712.8698 | 2 | 1423.7249 | 15.97 | 1    |
| 54 | TAFAYWNALSAK  | 90 | 706.8688 | 2 | 1411.7249 | 16.85 | -1   |
| 55 | AAFAAYWALAAK  | 90 | 655.3568 | 2 | 1308.6978 | 16.98 | 0.1  |
| 56 | ASFAAYWNALSAK | 89 | 692.8526 | 2 | 1383.6936 | 14.33 | 1.1  |
| 57 | TAFAAWNLLAAK  | 89 | 666.8742 | 2 | 1331.7349 | 14.44 | -1.7 |
| 58 | ASFAAYWAALSPK | 88 | 691.3685 | 2 | 1380.719  | 14.75 | -1.3 |
| 59 | ASFAEYWNLLSAK | 88 | 749.8881 | 2 | 1497.7615 | 15.57 | -1.8 |
| 60 | ASFAAAWALAAK  | 87 | 617.3376 | 2 | 1232.6665 | 14.76 | 0.2  |
| 61 | ASFAAAWALSAK  | 87 | 632.3442 | 2 | 1262.677  | 15.19 | -1.3 |
| 62 | ASFAAAWALLSAK | 86 | 646.3615 | 2 | 1290.7085 | 15.57 | 0.9  |
| 63 | AAFAAYWAAAAPK | 85 | 654.3486 | 2 | 1306.6821 | 14.27 | -2.1 |
| 64 | AAAAAYWNLLSAK | 85 | 667.8629 | 2 | 1333.7144 | 15.07 | 1.9  |
| 65 | ASFAAYWAALAPK | 84 | 683.3719 | 2 | 1364.7241 | 15.16 | -2.1 |
| 66 | AAFAAAWALLAPK | 83 | 643.3757 | 2 | 1284.7341 | 15.82 | -0.8 |
| 67 | TSFAAYWNALSPK | 82 | 720.8656 | 2 | 1439.7197 | 15.97 | 2.5  |
| 68 | AAFAEYWNALSAK | 82 | 720.8672 | 2 | 1439.7197 | 16.7  | 0.1  |
| 69 | AAFAAYWNALSPK | 79 | 704.8701 | 2 | 1407.73   | 14.97 | -4.7 |
| 70 | ASFAAYAALLAAK | 78 | 633.8635 | 2 | 1265.7131 | 15.16 | -0.4 |
| 71 | TAFAYWNALAAK  | 76 | 727.8732 | 2 | 1453.7354 | 15.23 | -2.5 |
| 72 | ASFAAYWNALAAK | 76 | 691.8661 | 2 | 1381.7141 | 16    | -0.1 |
| 73 | TSFAAYWAALAPK | 74 | 698.3796 | 2 | 1394.7346 | 13.76 | 0.4  |

**Identified sequences from MDM2 affinity selection condition B3. (ALC >70)**

RT = retention time.

### 3.4 Affinity selection with 12ca5

#### 3.4.1 Selection conditions

| Condition | 12ca5            | Library | per member <sup>2</sup> |
|-----------|------------------|---------|-------------------------|
| <b>A</b>  | 0.7 nmol, 100 µg | 1 µg    | 2 ng                    |
| <b>B</b>  | 0.7 nmol, 100 µg | 10 µg   | 20 ng                   |
| <b>C</b>  | 0.7 nmol, 100 µg | 50 µg   | 100 ng                  |

**12ca5 affinity selection condition.** <sup>a</sup>Library was incubated with 12ca5 in 1x PBS (total volume: 100 µL) for 30 min in 4 °C before the HPSEC-based affinity selection.

<sup>b</sup>Amount of each library member: amount of library divides by library diversity.

### 3.4.2 Identified sequences from condition A

| Entry | Sequence     | ALC (%) | <i>m/z</i> | <i>z</i> | Mass     | RT (min) | Mass error (ppm) |
|-------|--------------|---------|------------|----------|----------|----------|------------------|
| 1     | AAADVDPDYAAK | 98      | 545.784    | 2        | 1089.545 | 9.87     | 4                |
| 2     | AAYDAPDYAAK  | 99      | 577.7808   | 2        | 1153.54  | 9.29     | 7.8              |
| 3     | APADVDPDYAAK | 96      | 558.7908   | 2        | 1115.561 | 9.78     | 4.5              |
| 4     | YPADAPDYAAK  | 87      | 590.7881   | 2        | 1179.556 | 9.5      | -0.6             |
| 5     | YAADVADYAAK  | 99      | 578.7883   | 2        | 1155.556 | 11.01    | 8.9              |
| 6     | YAYDAPDYAAK  | 96      | 623.7952   | 2        | 1245.567 | 10.2     | 7.3              |
| 7     | YAADVDPDYAAK | 98      | 591.7977   | 2        | 1181.572 | 10.7     | 1.5              |
| 8     | AAYDVADYAAK  | 97      | 578.7892   | 2        | 1155.556 | 10.31    | -1               |
| 9     | YPYDAPDYAAK  | 98      | 636.8034   | 2        | 1271.582 | 10.52    | 5.4              |
| 10    | YPADVDPDYAAK | 99      | 604.8066   | 2        | 1207.587 | 11.06    | 2.4              |
| 11    | APYDVADYAAK  | 98      | 591.7969   | 2        | 1181.572 | 10.48    | 6.5              |
| 12    | YAYDVADYAAK  | 98      | 624.8032   | 2        | 1247.582 | 11.59    | -2.3             |
| 13    | YAYDVDPDYAAK | 99      | 637.812    | 2        | 1273.598 | 12.2     | -1.4             |
| 14    | YPYDVDPDYAAK | 96      | 650.8189   | 2        | 1299.614 | 12.03    | 1.4              |
| 15    | AAADVDPDYAAK | 98      | 545.784    | 2        | 1089.545 | 9.88     | 4                |

### Identified sequences from 12ca5 affinity selection condition A. (ALC > 80)

RT = retention time.

### 3.4.3 Identified sequences from condition B

| Entry | Sequence     | ALC (%) | <i>m/z</i> | <i>z</i> | Mass     | RT (min) | Mass error (ppm) |
|-------|--------------|---------|------------|----------|----------|----------|------------------|
| 1     | AAADVADYAAK  | 98      | 532.7753   | 2        | 1063.53  | 8.14     | 0.7              |
| 2     | YAADAPDYAAK  | 90      | 577.7821   | 2        | 1153.54  | 9.29     | 7.8              |
| 3     | AAADVDPDYAAK | 94      | 545.7843   | 2        | 1089.545 | 9.59     | 5.4              |
| 4     | APADVDPDYAAK | 96      | 558.7921   | 2        | 1115.561 | 9.78     | 4.5              |
| 5     | YPADAPDYAAK  | 93      | 590.7892   | 2        | 1179.556 | 9.5      | -0.6             |
| 6     | YAADVADYAAK  | 98      | 578.79     | 2        | 1155.556 | 10.31    | -1               |
| 7     | YAYDAPDYAAK  | 97      | 623.7964   | 2        | 1245.567 | 10.2     | 7.3              |
| 8     | AAYDVADYAAK  | 93      | 578.7907   | 2        | 1155.556 | 10.81    | 7.6              |
| 9     | YPYDAPDYAAK  | 97      | 636.8035   | 2        | 1271.582 | 10.52    | 5.4              |
| 10    | YPADVDPDYAAK | 87      | 604.8062   | 2        | 1207.587 | 11.36    | 2.5              |
| 11    | AAYDVDPDYAAK | 92      | 591.7988   | 2        | 1181.572 | 10.48    | 6.5              |
| 12    | YAYDVADYAAK  | 97      | 624.804    | 2        | 1247.582 | 11.43    | 7.4              |

|    |              |    |          |   |          |       |     |
|----|--------------|----|----------|---|----------|-------|-----|
| 13 | YAYDVDPDYAAK | 96 | 637.8125 | 2 | 1273.598 | 12.06 | 4.5 |
| 14 | YPYDVDPDYAAK | 96 | 650.8205 | 2 | 1299.614 | 11.86 | 3   |

**Identified sequences from 12ca5 affinity selection condition B. (ALC > 80)**

3.4.4 Identified sequences from condition C

| Entry | Sequence     | ALC (%) | m/z      | z | Mass     |       |      |
|-------|--------------|---------|----------|---|----------|-------|------|
| 1     | AAADVADYAAK  | 94      | 532.7751 | 2 | 1063.53  | 8.14  | 2.1  |
| 2     | YAADAPDYAAK  | 96      | 577.7806 | 2 | 1153.54  | 9.07  | 0.7  |
| 3     | AAADVDPDYAAK | 92      | 545.7846 | 2 | 1089.545 | 9.29  | 1.5  |
| 4     | APADVDPDYAAK | 90      | 558.7915 | 2 | 1115.561 | 9.35  | 4.3  |
| 5     | YPADAPDYAAK  | 93      | 590.7885 | 2 | 1179.556 | 9.4   | 0.9  |
| 6     | YAADVADYAAK  | 94      | 578.7891 | 2 | 1155.556 | 10.21 | -1.7 |
| 7     | YAYDAPDYAAK  | 94      | 623.7961 | 2 | 1245.567 | 10.1  | 5    |
| 8     | YPYDAPDYAAK  | 88      | 636.804  | 2 | 1271.582 | 10.46 | -0.5 |
| 9     | YPADVDPDYAAK | 85      | 604.8069 | 2 | 1207.587 | 10.83 | 1.9  |
| 10    | YAYDVADYAAK  | 98      | 624.8035 | 2 | 1247.582 | 11.35 | 2.8  |
| 11    | YAYDVDPDYAAK | 91      | 637.8116 | 2 | 1273.598 | 11.48 | 5.3  |
| 12    | YPYDVDPDYAAK | 96      | 650.8194 | 2 | 1299.614 | 11.1  | 1.3  |

**Identified sequences from 12ca5 affinity selection condition C. (ALC > 80)**

RT = retention time.

3.5 Affinity selection against 14-3-3

3.5.1 Selection condition

| Condition | 14-3-3          | Library | per member |
|-----------|-----------------|---------|------------|
| <b>A</b>  | 11 nmol, 300 µg | 900 µg  | 1753 ng    |

**14-3-3 affinity selection condition.** <sup>a</sup>Library was incubated with 14-3-3 in 1x PBS (total volume: 100 µL) for 30 min in 4 °C before the HPSEC-based affinity selection.

<sup>b</sup>Amount of each library member: amount of library divides by library diversity.

3.5.2 Identified sequences

| Entry | Peptide    | ALC (%) | m/z      | z | Mass      | RT (min) | Mass error (ppm) |
|-------|------------|---------|----------|---|-----------|----------|------------------|
| 1     | bbTAdAATeK | 97      | 613.8123 | 2 | 1225.6106 | 9.35     | 2                |
| 2     | AbTcdAATeK | 96      | 594.2922 | 2 | 1186.5747 | 9.57     | 1.3              |
| 3     | bAAcdeTTeK | 96      | 654.8088 | 2 | 1307.5911 | 9.73     | 2                |

|    |            |    |          |   |           |       |      |
|----|------------|----|----------|---|-----------|-------|------|
| 4  | bbAAdeTTeK | 96 | 674.3237 | 2 | 1346.627  | 9.76  | 1.8  |
| 5  | AbTAdAATeK | 95 | 572.7759 | 2 | 1143.5325 | 10.09 | 2.9  |
| 6  | AbAAdeTTeK | 93 | 633.2781 | 2 | 1264.5488 | 10.26 | 4.4  |
| 7  | bAAAdAATeK | 92 | 557.7689 | 2 | 1113.522  | 10.86 | 0.8  |
| 8  | AbAcdeTTeK | 92 | 654.8052 | 2 | 1307.5911 | 11.19 | 4.1  |
| 9  | bATAdTTeK  | 92 | 648.2841 | 2 | 1294.5593 | 11.31 | 2.3  |
| 10 | bbTcdAATeK | 92 | 635.3298 | 2 | 1268.6528 | 11.6  | 2.6  |
| 11 | AbTAdTTeK  | 92 | 648.2933 | 2 | 1294.5593 | 11.62 | 0.3  |
| 12 | bAAAdTAeK  | 92 | 618.2775 | 2 | 1234.5383 | 11.8  | 2.5  |
| 13 | bbAcdeTTeK | 92 | 695.8378 | 2 | 1389.6692 | 12.07 | 1.4  |
| 14 | bAAcdAATeK | 89 | 579.2857 | 2 | 1156.564  | 12.32 | -0.4 |
| 15 | bbTcdeTTeK | 89 | 710.8444 | 2 | 1419.6799 | 12.37 | -0.2 |
| 16 | bATcdAATeK | 88 | 396.5301 | 3 | 1186.5747 | 12.59 | 1.2  |
| 17 | AbTcdeTTeK | 87 | 669.8039 | 2 | 1337.6016 | 12.91 | -0.1 |
| 18 | bATcdeTAeK | 86 | 654.8079 | 2 | 1307.5911 | 12.95 | 2    |
| 19 | bbTAdTTeK  | 86 | 689.3232 | 2 | 1376.6377 | 13.16 | 1.1  |
| 20 | bAAAdTTeK  | 85 | 633.2827 | 2 | 1264.5488 | 13.22 | 1.3  |
| 21 | AATcdeTTeK | 84 | 628.7672 | 2 | 1255.5234 | 13.4  | 0.9  |
| 22 | AAAcdeTAeK | 84 | 598.7556 | 2 | 1195.5022 | 13.93 | 0.4  |
| 23 | bAAcdeTAeK | 84 | 639.8054 | 2 | 1277.5806 | 14.17 | 0.5  |
| 24 | AbAcdeTAeK | 84 | 639.8019 | 2 | 1277.5806 | 14.19 | 3.7  |
| 25 | bATAdATTeK | 83 | 587.7764 | 2 | 1173.543  | 14.46 | -0.8 |
| 26 | AAAAdTAeK  | 83 | 577.2344 | 2 | 1152.4602 | 14.63 | 4.8  |
| 27 | bbAcdAATeK | 83 | 620.3272 | 2 | 1238.6423 | 14.85 | 2.1  |
| 28 | bbAcdeTAeK | 83 | 680.8388 | 2 | 1359.6587 | 15.13 | 1.8  |
| 29 | AAAAdTTeK  | 82 | 592.2467 | 2 | 1182.4707 | 15.59 | 1.2  |
| 30 | bbTAdAAeK  | 82 | 598.8046 | 2 | 1195.6001 | 15.81 | 0.6  |

**Identified sequences from 14-3-3 affinity selection condition A. (ALC > 80)** (One letter code: b = Cha, T =  $\beta$ -Ser, c = Orn, d = pSer, e = Nph). Abbreviations: Cha, cyclohexyl alanine;  $\beta$ -Ser, beta-homoserine; Orn, ornithine; pSer, phosphoserine; Nph, 4-nitrophenylalanine. RT = retention time.

#### 4. Supplementary Methods 3: Method of molecular docking

##### 4.1 Preparation of structures

Besides alanine substitutions at residues 1, 2, 5, 8, 9, 11, and 12, peptide **34** also has an additional amino acid at the C-terminus (Lys13). To allow for separate evaluation of the effects of (1) the alanine substitutions and (2) the addition of Lys13 on MDM2 binding affinity, four peptides were prepared: PMI wild type (TSFAEYWNLSP-NH<sub>2</sub>),

PMI mutant (AAFAAYWAALAA-NH<sub>2</sub>), PMI-K (TSFAEYWNLLSPK-NH<sub>2</sub>), and peptide **34** (AAFAAYWAALAAK-NH<sub>2</sub>). The crystal structure was obtained from RCSB (PDB: 3LNZ)<sup>3</sup>. Chain G was used as the model for MDM2. The one missing residue in the structure (Glu 25) was added and minimized. Hydrogens were added using UCSF Chimera (glutamate, aspartate, and lysine residues are charged)<sup>4</sup>. Chain H was used as the ligand with residue 8 mutated from an Ala to an Asn to restore the wild type sequence of PMI. For all four peptide structures, the C-terminus was capped with NH<sub>2</sub>. Based on the PMI wild type, each mutated structure was created.

To create PMI-K, a Lys residue was added to the uncapped PMI and then capped with NH<sub>2</sub>. The added region of the peptide was minimized while the first twelve residues and side chains were left fixed. All the aforementioned operations were carried out using UCSF Chimera<sup>4</sup>. PMI mutant AAFAAYWAALAA-NH<sub>2</sub> was created by mutating residues 1, 2, 5, 8, 9, 11, and 12 in PMI wild type to alanine. Peptide **34** was created by mutating residues 1, 2, 5, 8, 9, 11, and 12 of PMI-K to alanine. Note that the mutated structures were not minimized. The backbone  $\phi$ ,  $\psi$  angles of the first twelve residues on all four structures were the same as those of chain H in 3LNZ. Hydrogens were added to all peptide structures using UCSF Chimera (the N-termini and any Glu, Asp, and Lys side chains were charged).

#### 4.2 Docking Experiment

AutoDock Vina was used to conduct the docking experiment.<sup>5</sup> The inputs were generated using AutoDock Tools. For the MDM2 protein, Kollman charges were added, and the backbone and side chains remained rigid. For the peptide ligands, the backbones were kept rigid and the side chain torsion angles were flexible. To ensure that starting position of docking did not match the crystal structure, the MDM2 protein was moved from the crystal structure position by 10 Å in each of the x, y, and z directions. The search box was set to 30 Å by 30 Å by 30 Å centered at the coordinates of C $\alpha$  of residue 6 from chain H in the crystal structure (shifted by 10 Å in each direction to match the shift performed in the MDM2 coordinates).

#### 4.3 Docking result

Simultaneous Ala substitutions of all 7 non-hot spot residues (residues 1, 2, 5, 8, 9, 11, and 12) improves the calculated binding affinity with a  $\Delta\Delta G$  of -3.4 kcal/mol for PMI and -2.5 kcal/mol for PMI-K. The addition of Lys impairs the binding affinity by 0.4 kcal/mol for PMI wild type and by 1.3 kcal/mol for PMI mutant.

## 5. Supplementary Note 2: Peptide characterization and validation

### 5.1 (i, i+4) alanine-substituted peptides

#### Peptide 1

**Sequence:** ASFAAYWNLLSP-CONH<sub>2</sub>

**HPLC:** method A

**HRMS (ESI-QTOF):** Calcd. for (M + 2H)<sup>2+</sup>: 669.843, found: 669.844. ppm=1.5

**Total ion chromatogram:**

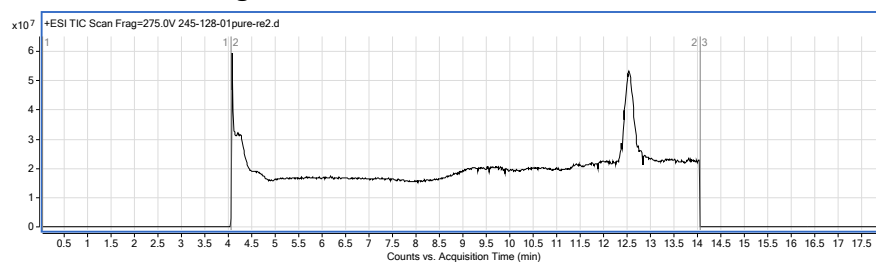

#### Mass spectrum of major compound

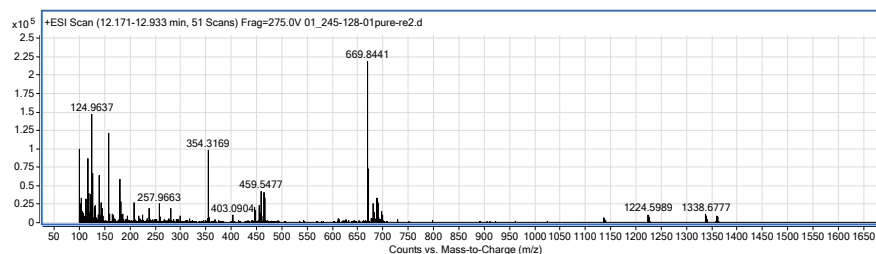

## Peptide 2

**Sequence:** TAFAEAWNLLSP-CONH<sub>2</sub>

**HPLC:** method B

**HRMS (ESI-QTOF):** Calcd. for (M + H)<sup>+</sup>: 1318.476, found: 1318.474. ppm=1.5

**Total ion chromatogram:**

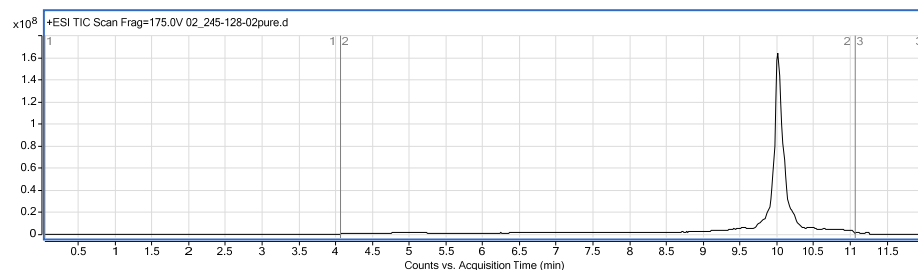

**Mass spectrum of major compound**

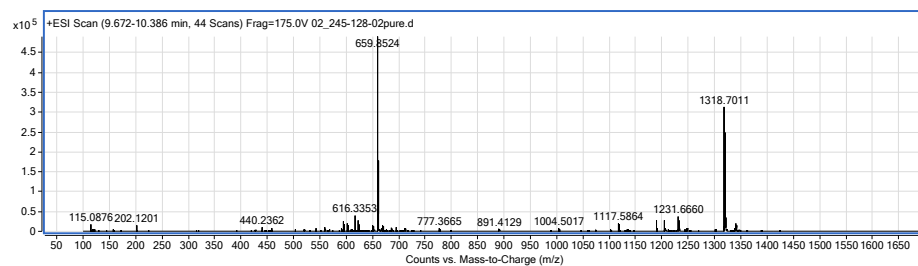

## Peptide 3

**Sequence:** TSAAEYANLLSP-CONH<sub>2</sub>

**HPLC:** method B

**HRMS (ESI-QTOF):** Calcd. for (M + H)<sup>+</sup>: 1235.648, found: 1235.647. ppm=1.0

**Total ion chromatogram:**

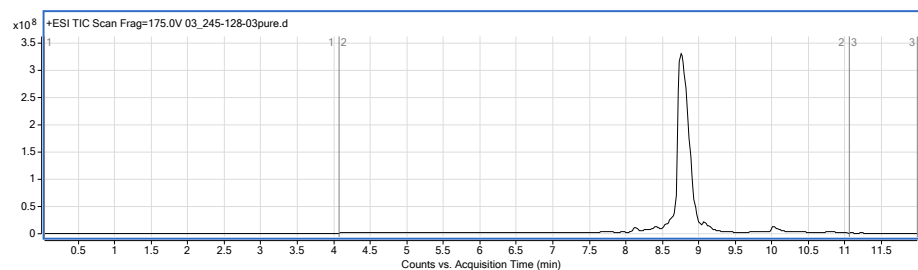

**Mass spectrum of major compound**

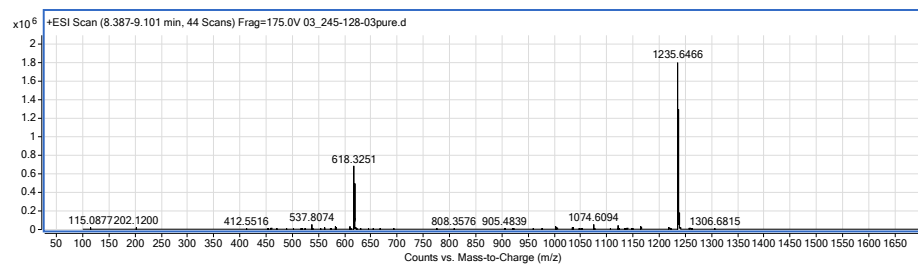

#### Peptide 4

**Sequence:** TSFAEYWALLSP-CONH<sub>2</sub>

**HPLC:** method B

**HRMS (ESI-QTOF):** Calcd. for (M + 2H)<sup>2+</sup>: 692.368, found: 692.363. ppm=7.2

**Total ion chromatogram:**

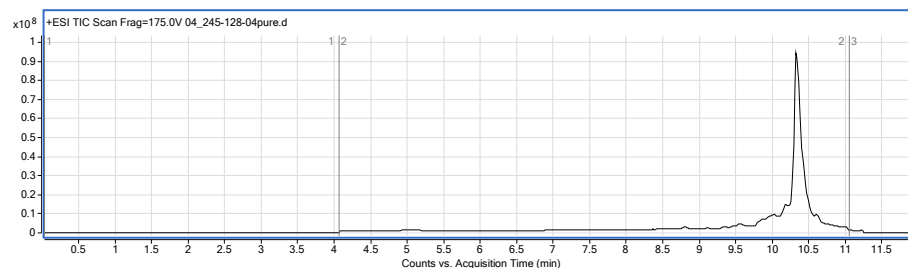

**Mass spectrum of major compound**

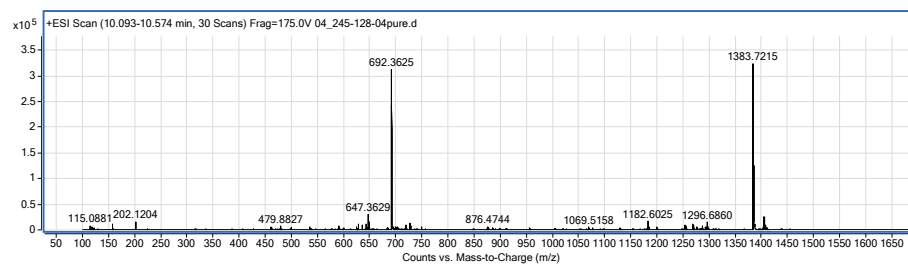

#### Peptide 5

**Sequence:** TSFAAYWNALSP-CONH<sub>2</sub>

**HPLC:** method B

**HRMS (ESI-QTOF):** Calcd. for (M + H)<sup>+</sup>: 1326.649, found: 1326.656. ppm=5.2

**Total ion chromatogram:**

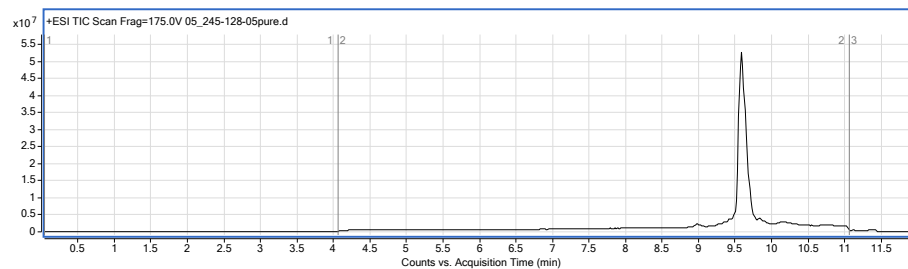

**Mass spectrum of major compound**

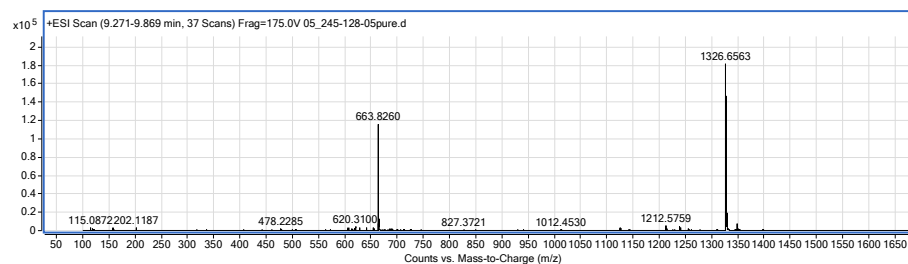

## Peptide 6

**Sequence:** TSFAEAWNLASP-CONH<sub>2</sub>

**HPLC:** method A

**HRMS (ESI-QTOF):** Calcd. for (M + 2H)<sup>2+</sup>: 646.805, found: 646.814. ppm=13

**Total ion chromatogram:**

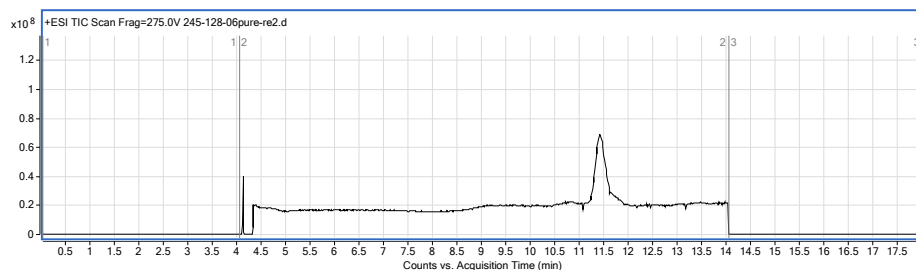

**Mass spectrum of major compound**

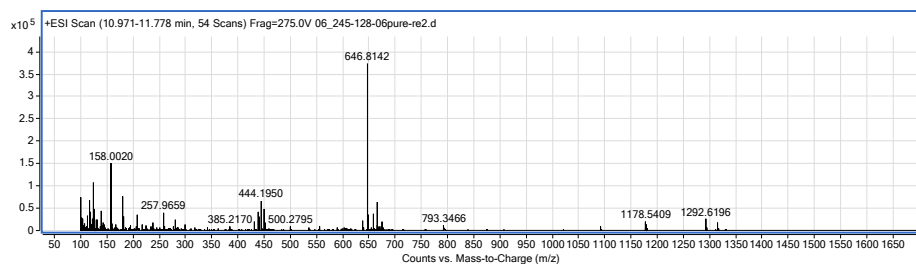

## Peptide 7

**Sequence:** TSFAEYANLLAP-CONH<sub>2</sub>

**HPLC:** method B

**HRMS (ESI-QTOF):** Calcd. for (M + H)<sup>+</sup>: 1295.675, found: 1295.679. ppm=1.5

**Total ion chromatogram:**

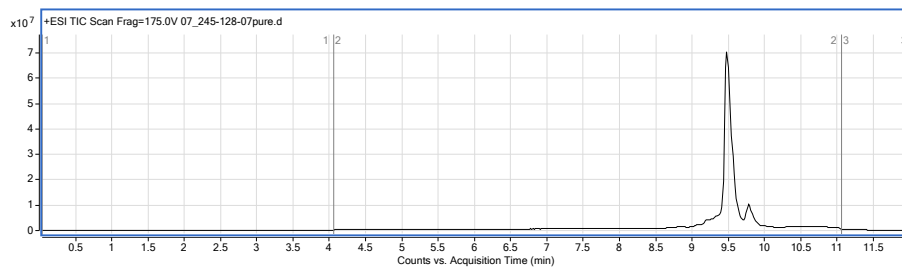

**Mass spectrum of major compound**

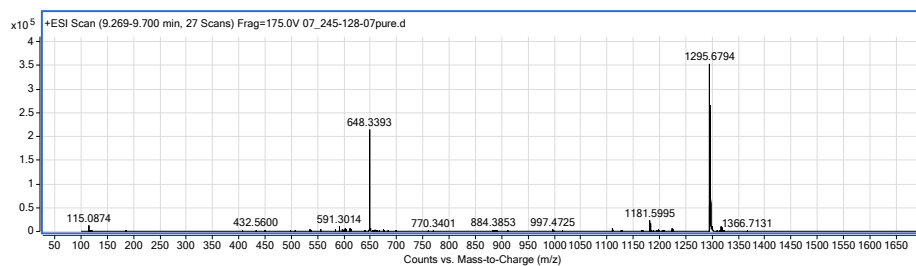

## Peptide 8

**Sequence:** TSFAEYWALLSA-CONH<sub>2</sub>

**HPLC:** method A

**HRMS (ESI-QTOF):** Calcd. for (M + H)<sup>+</sup>: 1357.680, found: 1357.681. ppm=1.0

**Total ion chromatogram:**

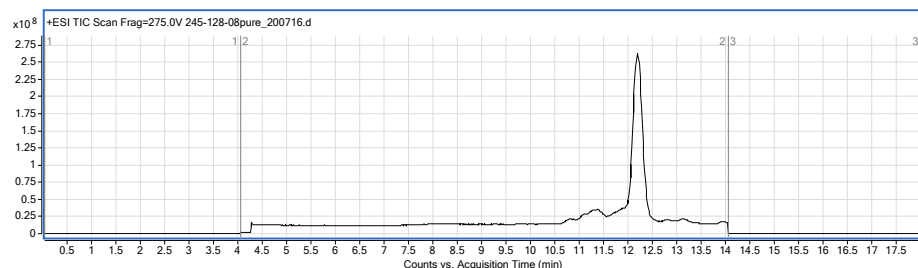

**Mass spectrum of major compound**

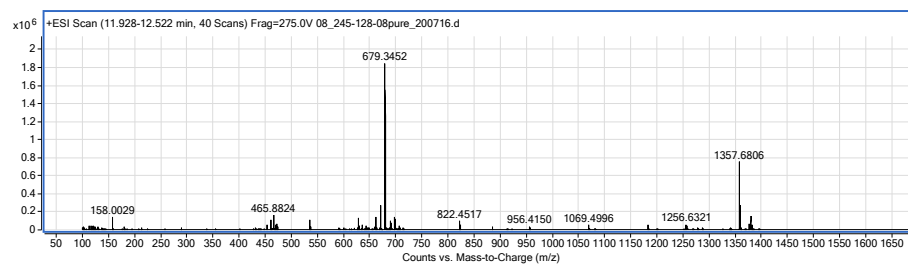

5.2 (i, i+4) perfluoroaryl stapled peptides

## Peptide 9

**Sequence:** C\*SFAC\*YWNLLSP-CONH<sub>2</sub> (C\*: hexafluorobenzene-stapled cysteine)

**HPLC:** method C

**HRMS (ESI-QTOF):** Calcd. for (M + 2H)<sup>2+</sup>: 774.804, found: 774.808. ppm=5.1

**Total ion chromatogram:**

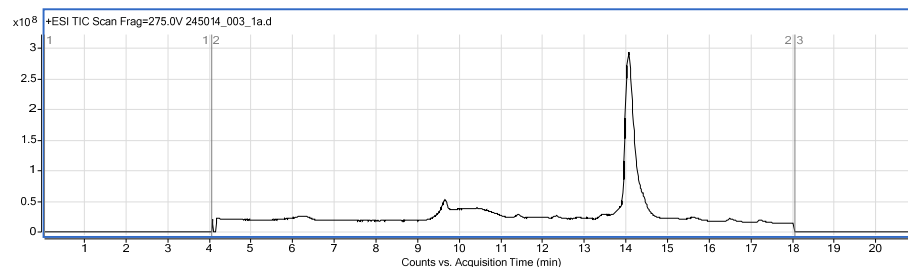

**Mass spectrum of major compound**

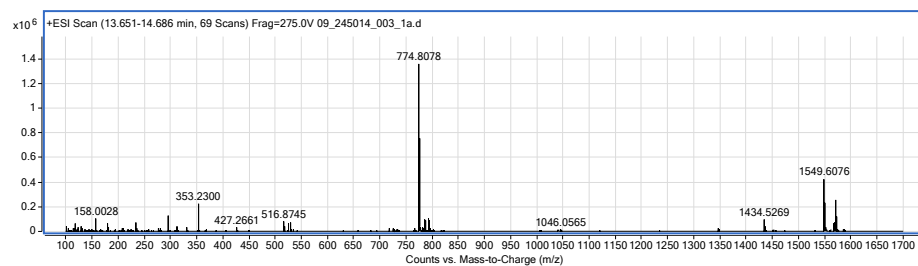

## Peptide 10

**Sequence:** TC\*FAEC\*WLLSP-CONH<sub>2</sub> (C\*: hexafluorobenzene-stapled cysteine)

**HPLC:** method C

**HRMS (ESI-QTOF):** Calcd. for (M + H)<sup>+</sup>: 1528.583, found: 1528.601. ppm=12

**Total ion chromatogram:**

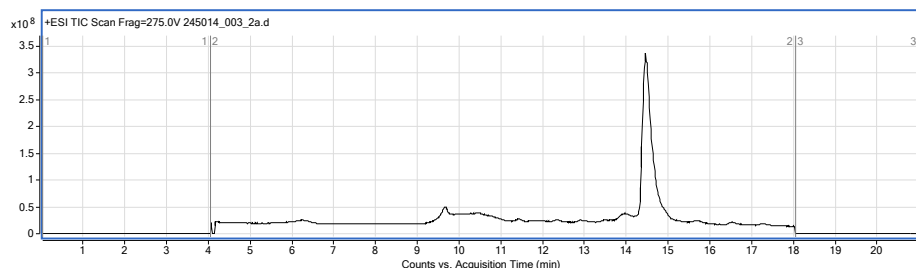

**Mass spectrum of major compound**

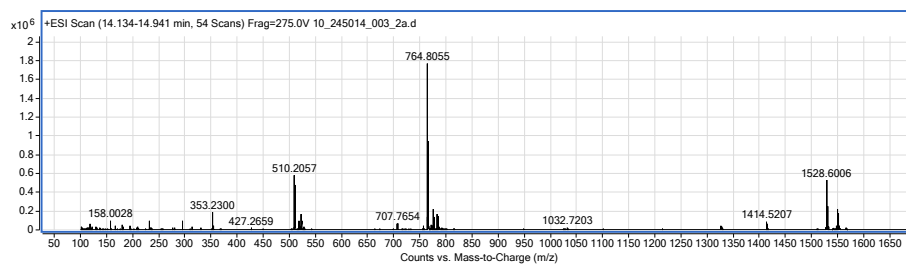

## Peptide 11

**Sequence:** TSC\*AEYC\*NLLSP-CONH<sub>2</sub> (C\*: hexafluorobenzene-stapled cysteine)

**HPLC:** method C

**HRMS (ESI-QTOF):** Calcd. for (M + H)<sup>+</sup>: 1445.531, found: 1445.548. ppm=11

**Total ion chromatogram:**

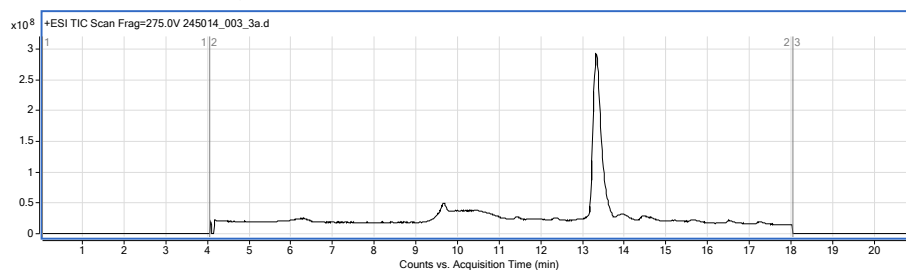

**Mass spectrum of major compound**

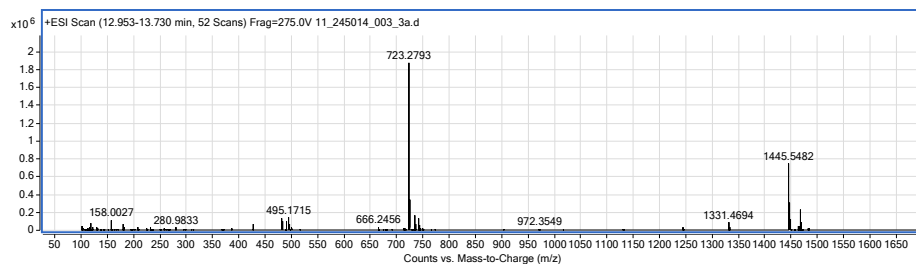

## Peptide 12

**Sequence:** TSFC\*EYWC\*LLSP-CONH<sub>2</sub> (C\*: hexafluorobenzene-stapled cysteine)

**HPLC:** method C

**HRMS (ESI-QTOF):** Calcd. for (M + 2H)<sup>2+</sup>: 797.299, found: 797.313. ppm=17

**Total ion chromatogram:**

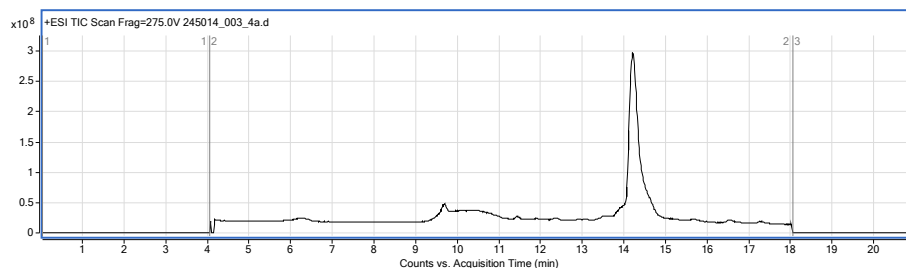

**Mass spectrum of major compound**

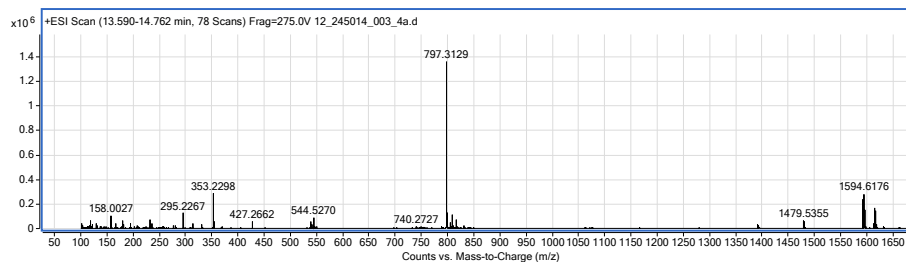

## Peptide 13

**Sequence:** TSFAC\*YWNC\*LSP-CONH<sub>2</sub> (C\*: hexafluorobenzene-stapled cysteine)

**HPLC:** method C

**HRMS (ESI-QTOF):** Calcd. for (M + 2H)<sup>2+</sup>: 768.786, found: 768.790. ppm=5.2

**Total ion chromatogram:**

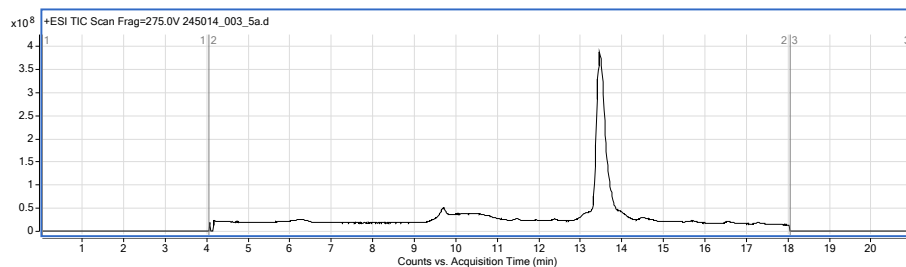

**Mass spectrum of major compound**

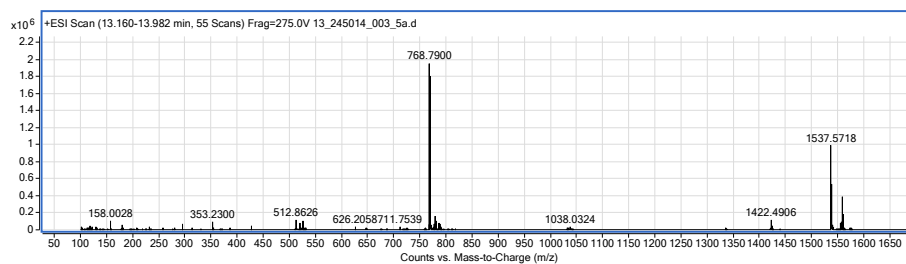

### Peptide 14

**Sequence:** TSFAEC\*WNLC\*SP-CONH<sub>2</sub> (C\*: hexafluorobenzene-stapled cysteine)

**HPLC:** Method C

**HRMS (ESI-QTOF):** Calcd. for (M + 2H)<sup>2+</sup>: 751.766, found: 751.779. ppm=17

**Total ion chromatogram:**

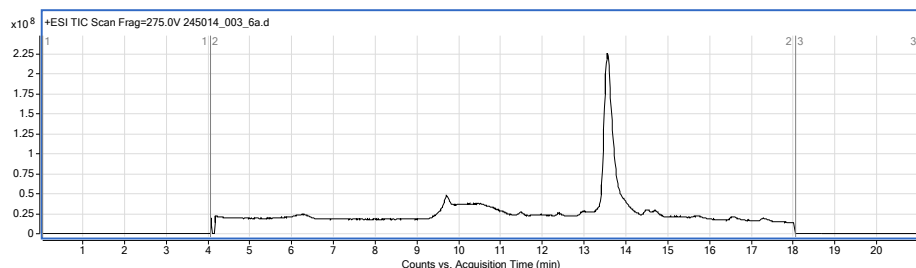

**Mass spectrum of major compound**

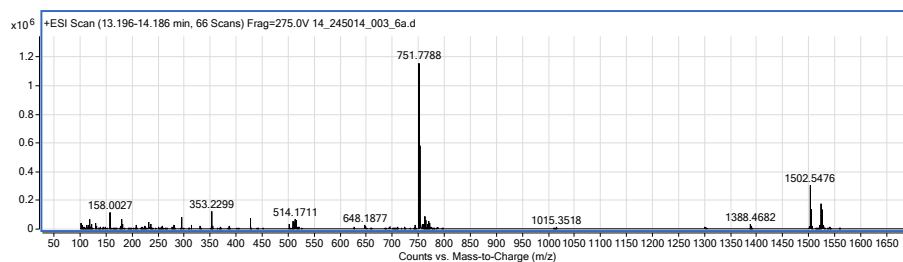

### Peptide 15

**Sequence:** TSFAEYC\*NLLC\*P-CONH<sub>2</sub> (C\*: hexafluorobenzene-stapled cysteine)

**HPLC:** Method C

**HRMS (ESI-QTOF):** Calcd. for (M + H)<sup>+</sup>: 1505.567, found: 1505.585. ppm=12

**Total ion chromatogram:**

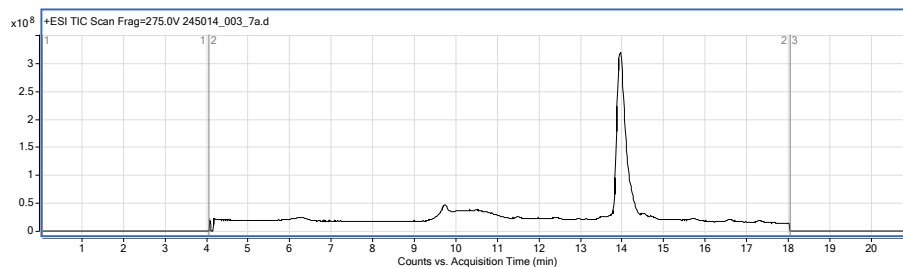

**Mass spectrum of major compound**

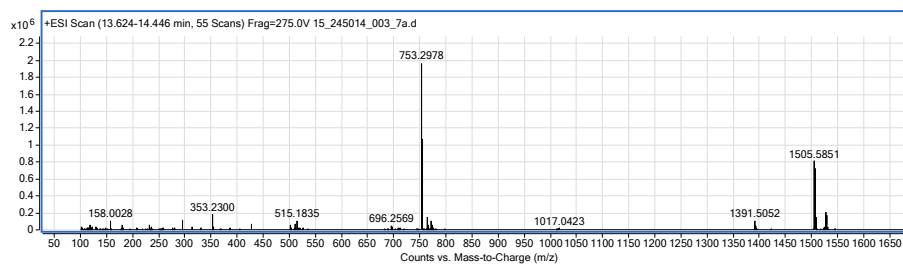

### Peptide 16

**Sequence:** TSFAEYWC\*LLSC\*-CONH<sub>2</sub> (C\*: hexafluorobenzene-stapled cysteine)

**HPLC:** Method C

**HRMS (ESI-QTOF):** Calcd. for (M + H)<sup>+</sup>: 1567.583, found: 1567.599. ppm=10

**Total ion chromatogram:**

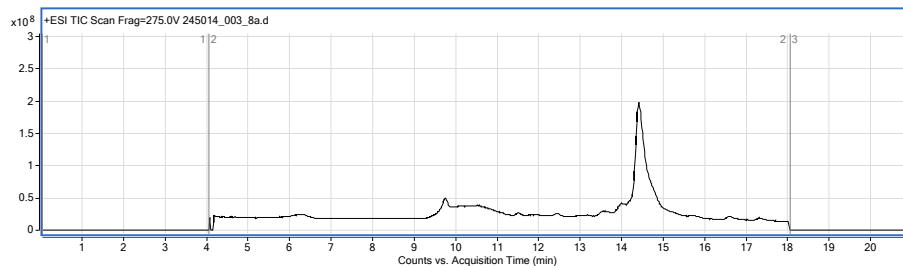

**Mass spectrum of major compound**

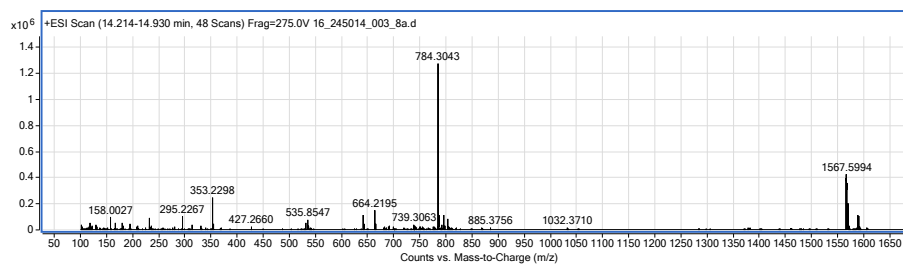

### 5.3 Multi-alanine-substituted peptides

#### Peptide 17

**Sequence:** TSFAEYWAALSPK-CONH<sub>2</sub>

**HPLC:** Method B

**HRMS (ESI-QTOF):** Calcd. for (M + H)<sup>+</sup>: 1469.724, found: 1469.737.ppm=8.8

**Total ion chromatogram:**

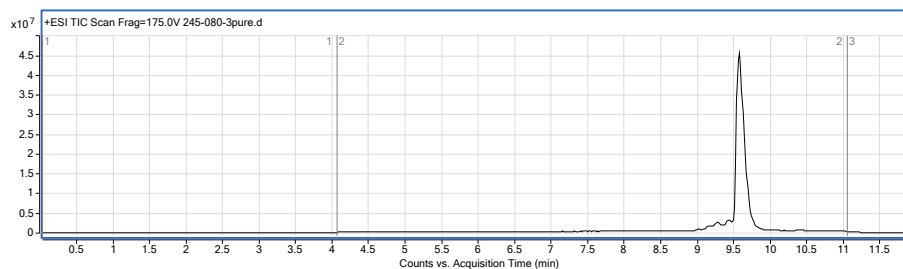

**Mass spectrum of major compound**

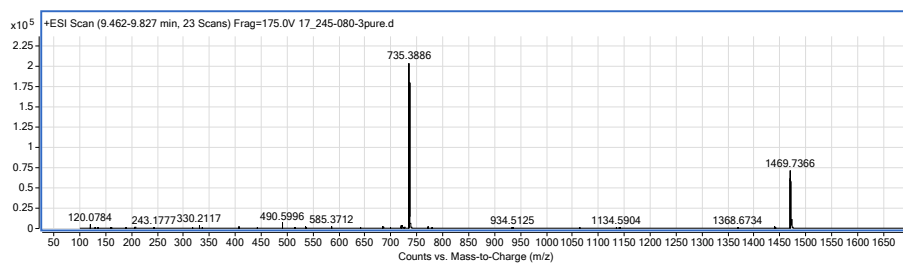

## Peptide 18

**Sequence:** TSFAEYWNALSAK-CONH<sub>2</sub>

**HPLC:** Method B

**HRMS (ESI-QTOF):** Calcd. for (M + H)<sup>+</sup>: 1486.784, found: 1486.799. ppm=10

**Total ion chromatogram:**

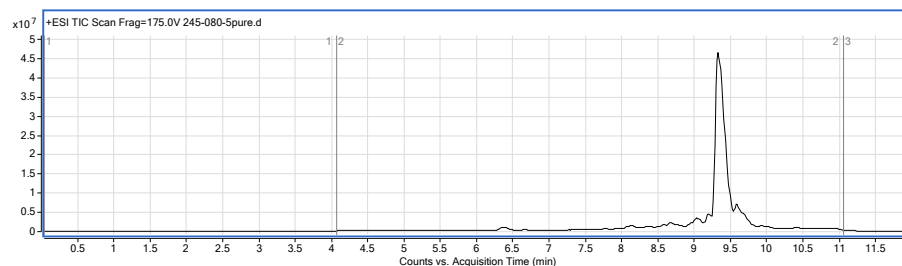

**Mass spectrum of major compound**

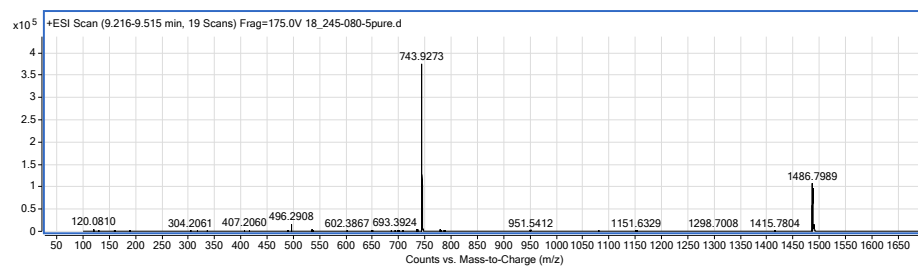

## Peptide 19

**Sequence:** TSFAEYWNALAPK-CONH<sub>2</sub>

**HPLC:** Method B

**HRMS (ESI-QTOF):** Calcd. for (M + H)<sup>+</sup>: 1496.835, found: 1496.847. ppm=8

**Total ion chromatogram:**

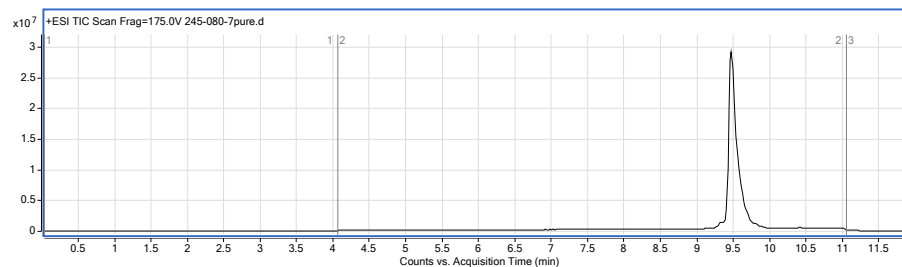

**Mass spectrum of major compound**

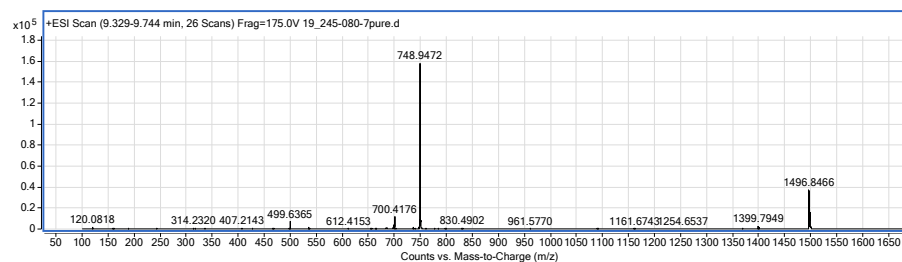

## Peptide 20

**Sequence:** TSFAEYWNALAAK-CONH<sub>2</sub>

**HPLC:** Method B

**HRMS (ESI-QTOF):** Calcd. for (M + 2H)<sup>2+</sup>: 735.860, found: 735.856. ppm=5.4

**Total ion chromatogram:**

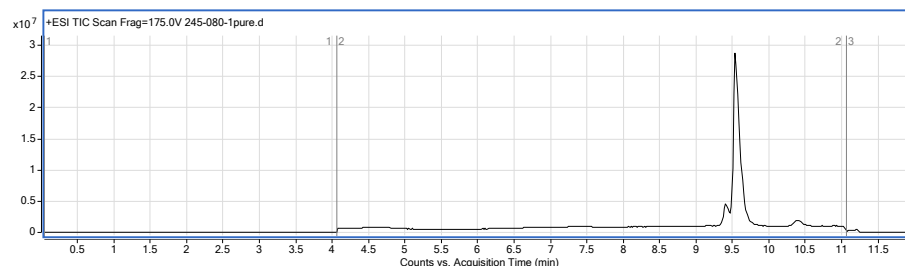

**Mass spectrum of major compound**

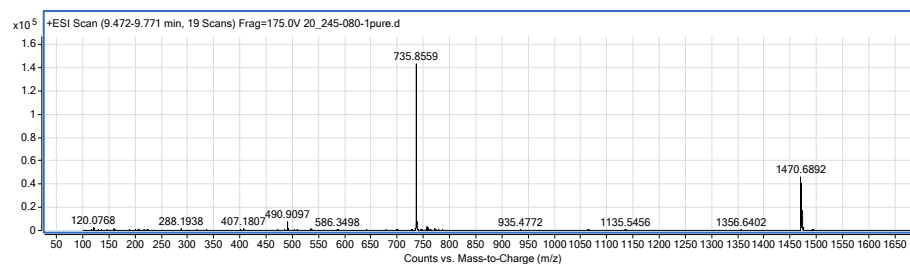

## Peptide 21

**Sequence:** ASFAEYWAALSPK-CONH<sub>2</sub>

**HPLC:** Method B

**HRMS (ESI-QTOF):** Calcd. for (M + H)<sup>+</sup>: 1439.713, found: 1439.7109. ppm=2

**Total ion chromatogram:**

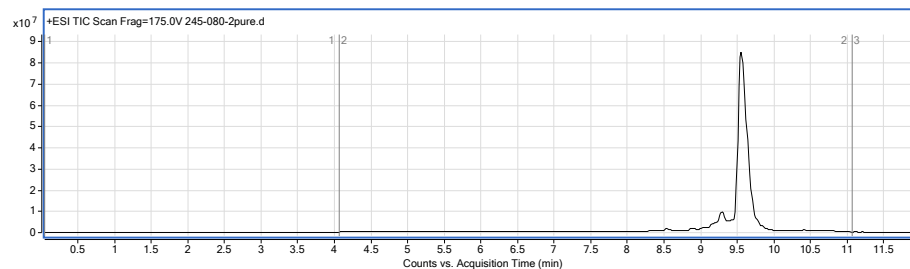

**Mass spectrum of major compound**

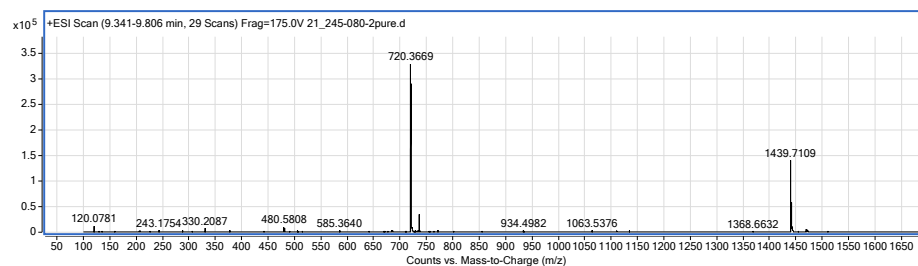

## Peptide 22

**Sequence:** TSFAEYWAALSAK-CONH<sub>2</sub>

**HPLC:** Method B

**HRMS (ESI-QTOF):** Calcd. for (M + 2H)<sup>2+</sup>: 722.344, found: 722.334. ppm=13

**Total ion chromatogram:**

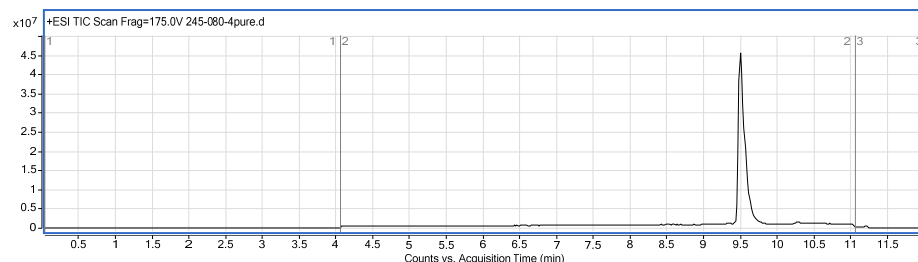

**Mass spectrum of major compound**

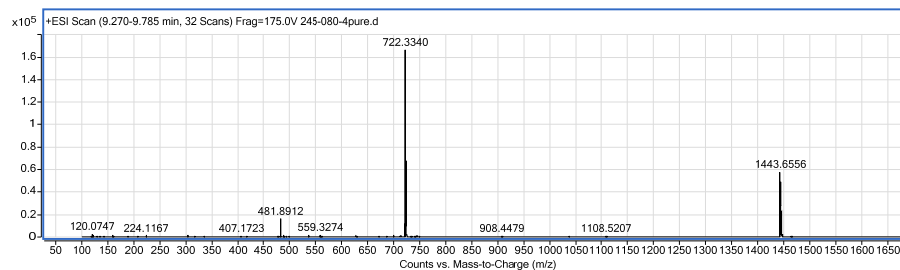

## Peptide 23

**Sequence:** TAF AEYWNALSAK-CONH<sub>2</sub>

**HPLC:** Method B

**HRMS (ESI-QTOF):** Calcd. for (M + H)<sup>+</sup>: 1470.819, found: 1470.829. ppm=6.8

**Total ion chromatogram:**

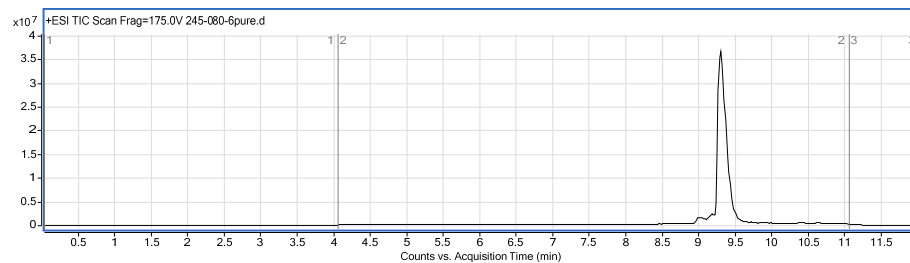

**Mass spectrum of major compound**

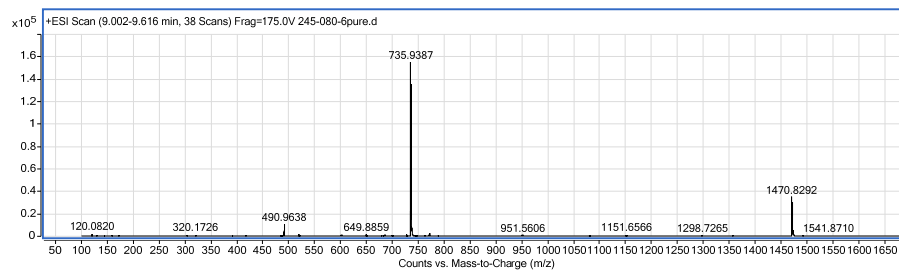

## Peptide 24

**Sequence:** ASFAEYWAALAPK-CONH<sub>2</sub>

**HPLC:** Method B

**HRMS (ESI-QTOF):** Calcd. for (M + H)<sup>+</sup>: 1423.719, found: 1423.755. ppm=12

**Total ion chromatogram:**

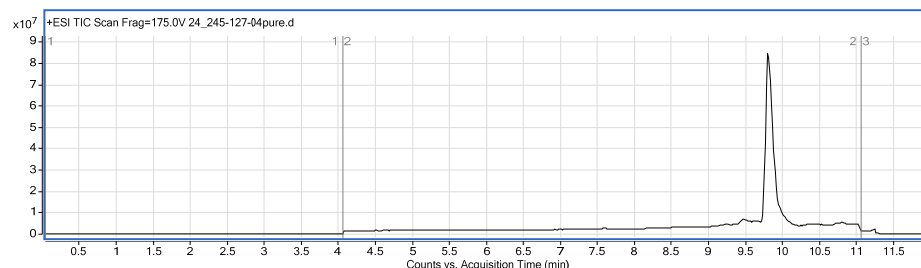

**Mass spectrum of major compound**

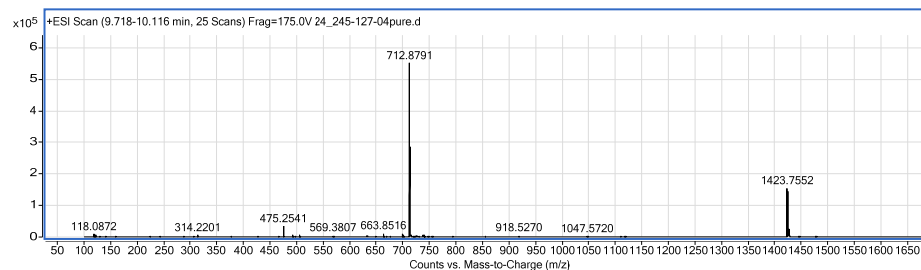

## Peptide 25

**Sequence:** TSFAAYWAALSAK-CONH<sub>2</sub>

**HPLC:** Method C

**HRMS (ESI-QTOF):** Calcd. for (M + H)<sup>+</sup>: 1385.713, found: 1385.723. ppm=10

**Total ion chromatogram:**

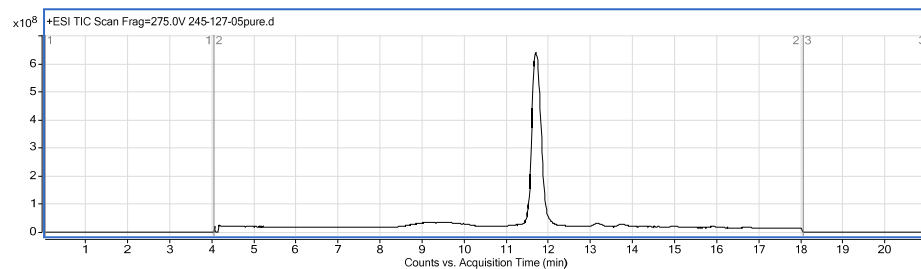

**Mass spectrum of major compound**

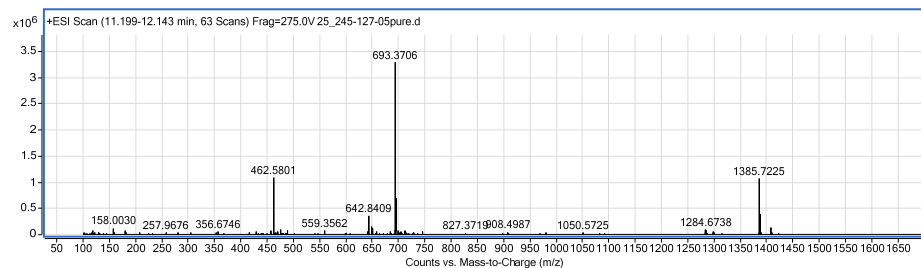

## Peptide 26

**Sequence:** TAF AEYWAALSAK-CONH<sub>2</sub>

**HPLC:** Method C

**HRMS (ESI-QTOF):** Calcd. for (M + H)<sup>+</sup>: 1427.723, found: 1427.733. ppm=7

**Total ion chromatogram:**

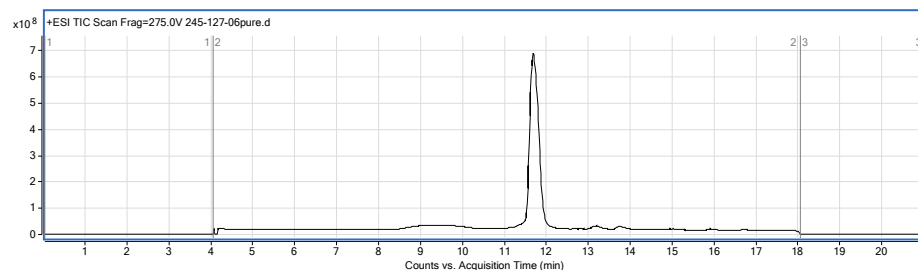

**Mass spectrum of major compound**

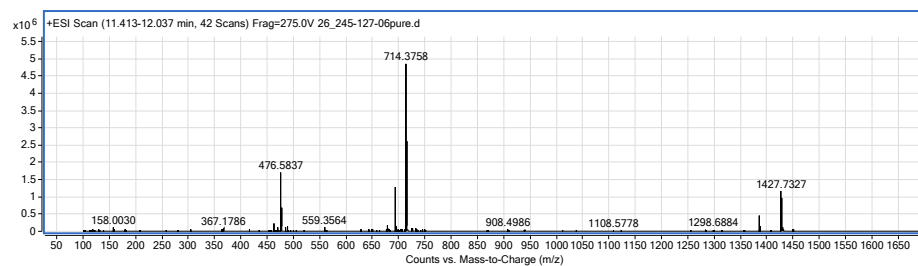

## Peptide 27

**Sequence:** AAFAEYWAALSPK-CONH<sub>2</sub>

**HPLC:** Method B

**HRMS (ESI-QTOF):** Calcd. for (M + H)<sup>+</sup>: 1423.759, found: 1423.759. ppm=1

**Total ion chromatogram:**

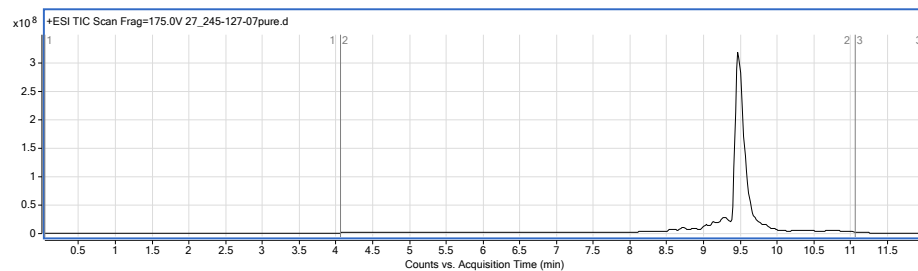

**Mass spectrum of major compound**

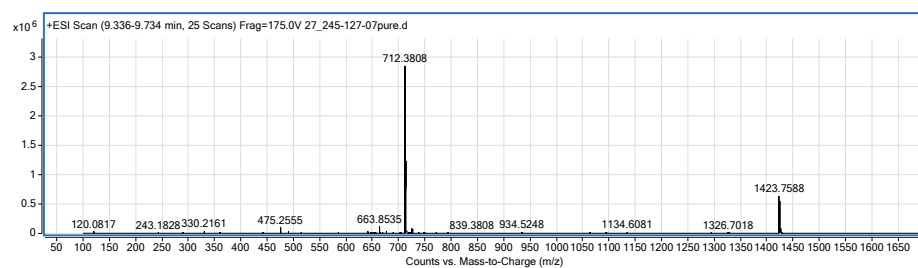

## Peptide 28

**Sequence:** ASFAEYWNALAAK-CONH<sub>2</sub>

**HPLC:** Method B

**HRMS (ESI-QTOF):** Calcd. for (M + H)<sup>+</sup>: 1440.759, found: 1440.750. ppm=6

**Total ion chromatogram:**

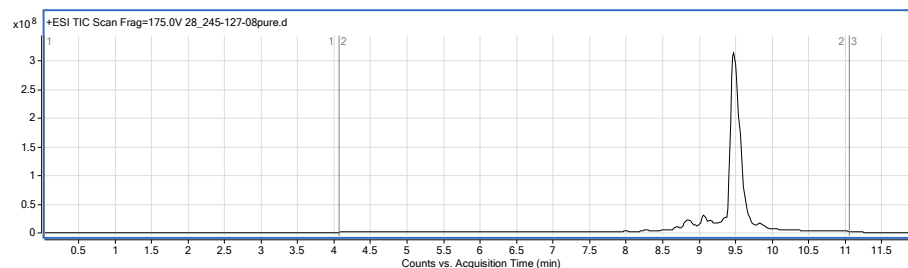

**Mass spectrum of major compound**

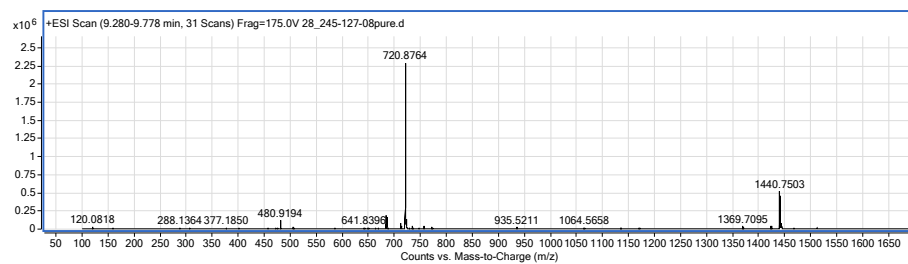

## Peptide 29

**Sequence:** ASFAEYWAALAAK-CONH<sub>2</sub>

**HPLC:** Method C

**HRMS (ESI-QTOF):** Calcd. for (M + H)<sup>+</sup>: 1397.703, found: 1397.722. ppm=13

**Total ion chromatogram:**

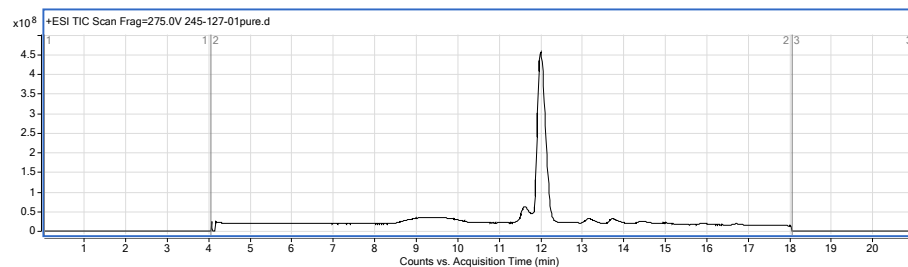

**Mass spectrum of major compound**

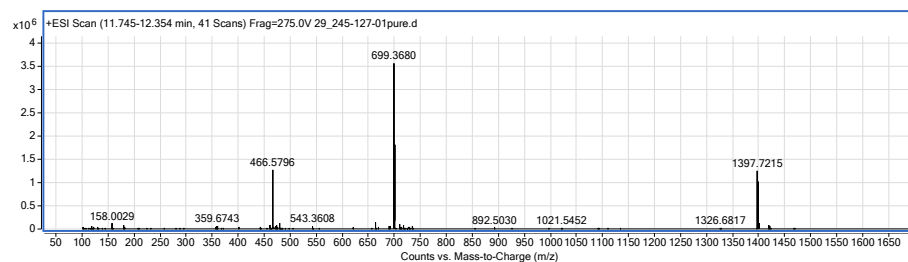

### Peptide 30

**Sequence:** ASFAAYWAALSAK-CONH<sub>2</sub>

**HPLC:** Method C

**HRMS (ESI-QTOF):** Calcd. for (M + 2H)<sup>2+</sup>: 678.346, found: 678.363. ppm=12

**Total ion chromatogram:**

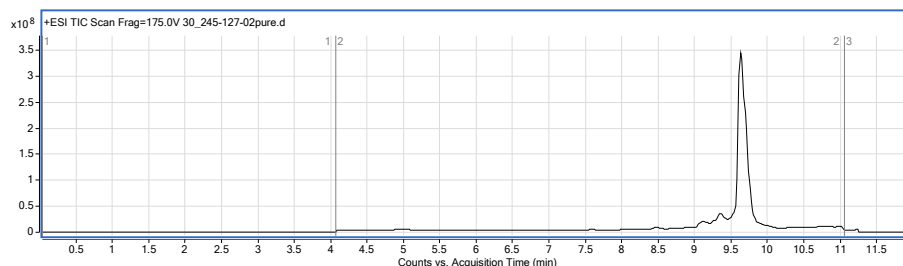

**Mass spectrum of major compound**

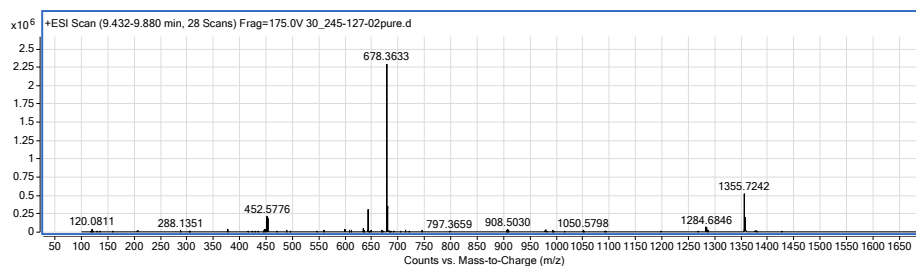

### Peptide 31

**Sequence:** AAFAEYWNALAAK-CONH<sub>2</sub>

**HPLC:** Method A

**HRMS (ESI-QTOF):** Calcd. for (M + H)<sup>+</sup>: 1424.714, found: 1424.727. ppm=7.7

**Total ion chromatogram:**

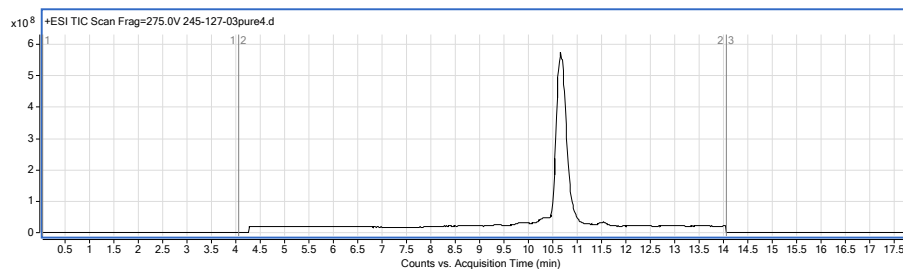

**Mass spectrum of major compound**

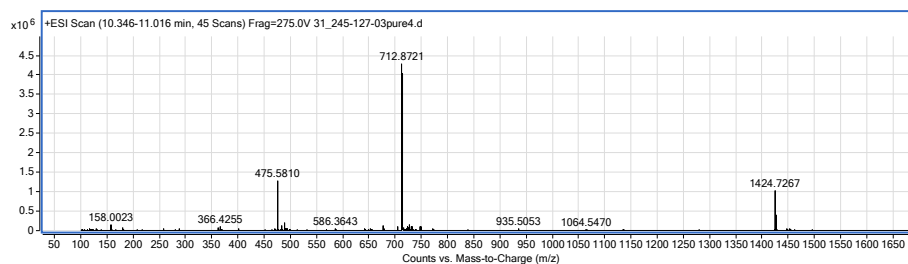

### Peptide 32

**Sequence:** TAFAYWAALAAK-CONH<sub>2</sub>

**HPLC:** Method D

**HRMS (ESI-QTOF):** Calcd. for (M + H)<sup>+</sup>: 1353.713, found: 1353.734. ppm=15

**Total ion chromatogram:**

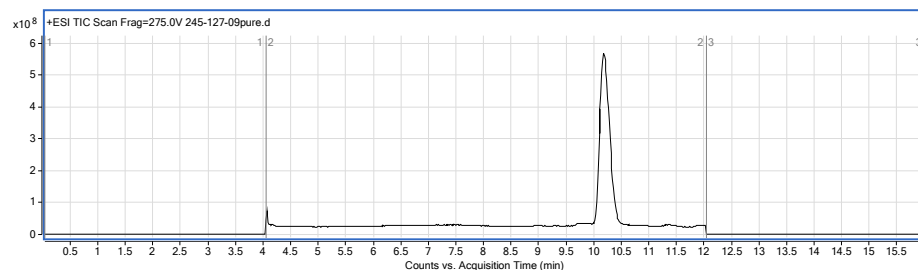

**Mass spectrum of major compound**

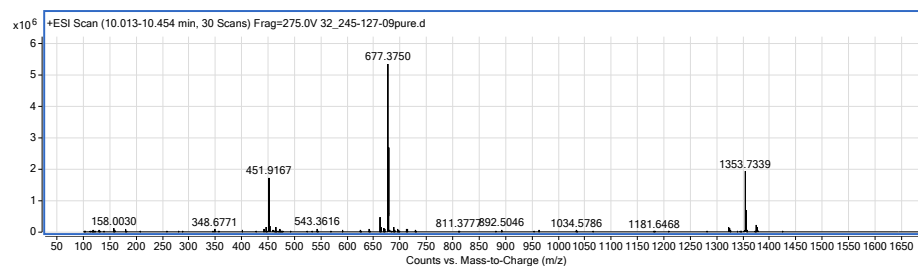

### Peptide 33

**Sequence:** ASFAAYWAALAAK-CONH<sub>2</sub>

**HPLC:** Method A

**HRMS (ESI-QTOF):** Calcd. for (M + H)<sup>+</sup>: 1339.697, found: 1339.709. ppm=9.4

**Total ion chromatogram:**

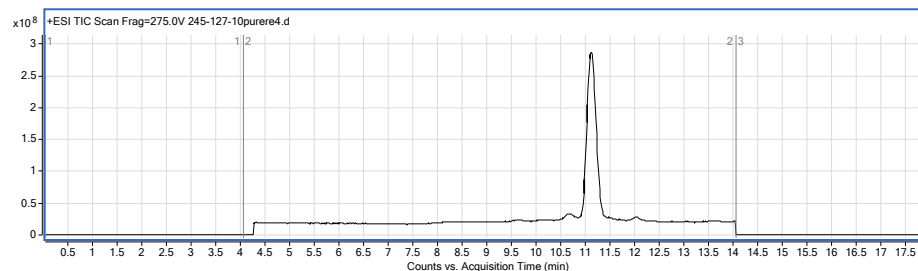

**Mass spectrum of major compound**

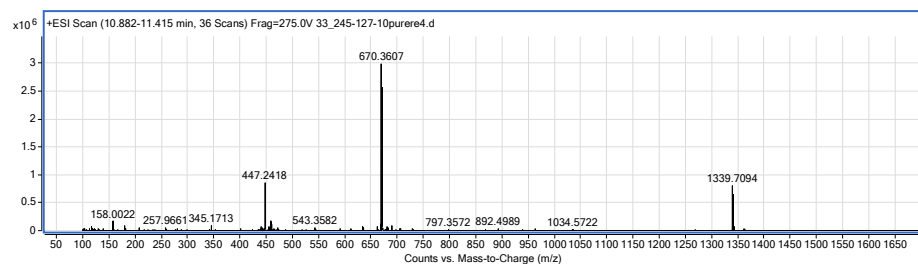

### Peptide 34

**Sequence:** AAFAAYWAALAAK-CONH<sub>2</sub>

**HPLC:** Method D

**HRMS (ESI-QTOF):** Calcd. for (M + H)<sup>+</sup>: 1323.702, found: 1323.723. ppm=13

**Total ion chromatogram:**

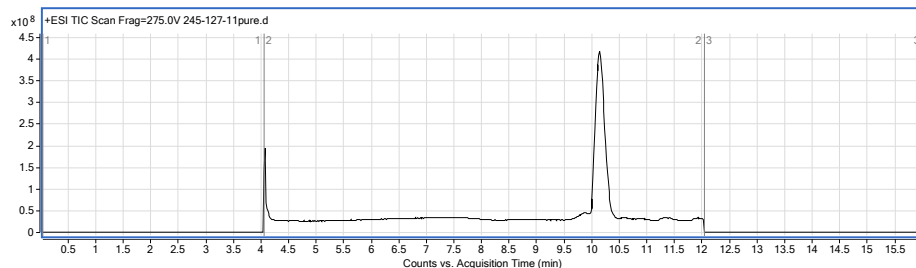

**Mass spectrum of major compound**

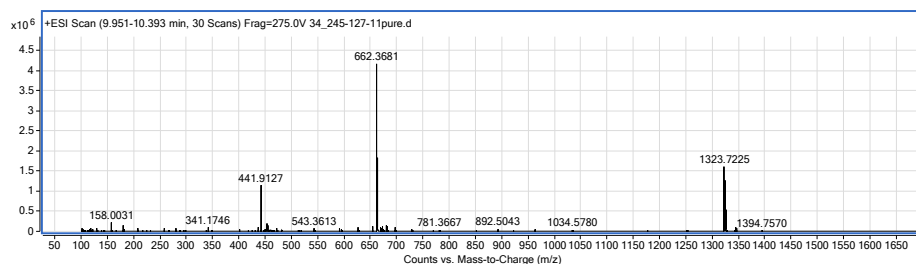

### 5.4 Multi-alanine-substituted stapled peptides

#### Peptide 35

**Sequence:** AAFC\*EYWC\*ALSP-CONH<sub>2</sub> (C\*: hexafluorobenzene-stapled cysteine)

**HPLC:** Method E

**HRMS (ESI-QTOF):** Calcd. for (M + H)<sup>+</sup>: 1505.546, found: 1505.567. ppm=15

**Total ion chromatogram:**

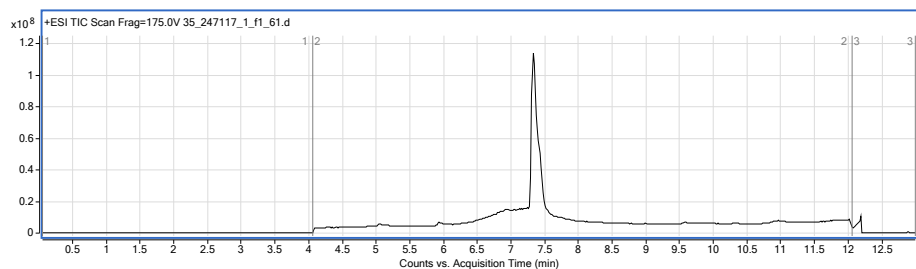

**Mass spectrum of major compound**

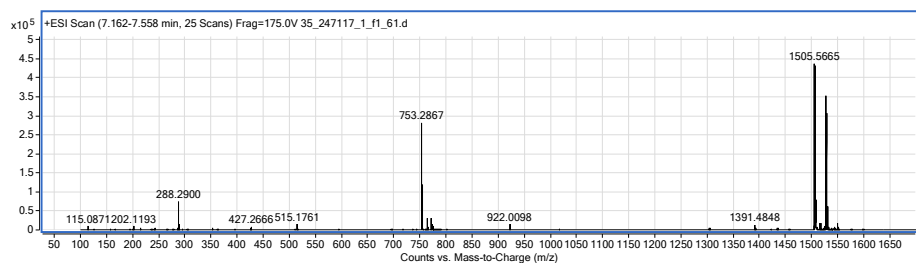

### Peptide 36

**Sequence:** ASFC\*EYWC\*ALAA-CONH<sub>2</sub> (C\*: hexafluorobenzene-stapled cysteine)

**HPLC:** Method E

**HRMS (ESI-QTOF):** Calcd. for (M + 2H)<sup>2+</sup>: 740.265, found: 740.279. ppm=11

**Total ion chromatogram:**

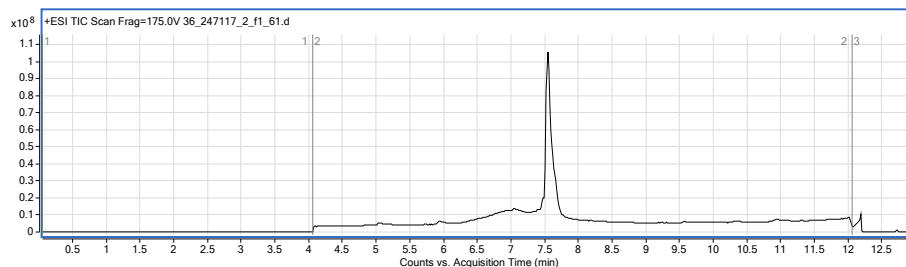

**Mass spectrum of major compound**

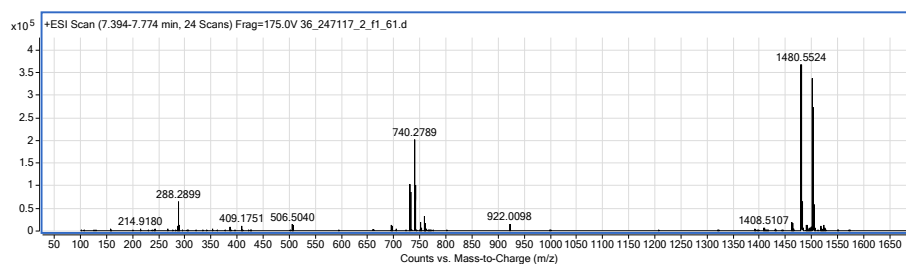

### Peptide 37

**Sequence:** TSFAC\*YWAC\*LSA-CONH<sub>2</sub> (C\*: hexafluorobenzene-stapled cysteine)

**HPLC:** Method E

**HRMS (ESI-QTOF):** Calcd. for (M + 2H)<sup>2+</sup>: 734.265, found: 734.279. ppm=14

**Total ion chromatogram:**

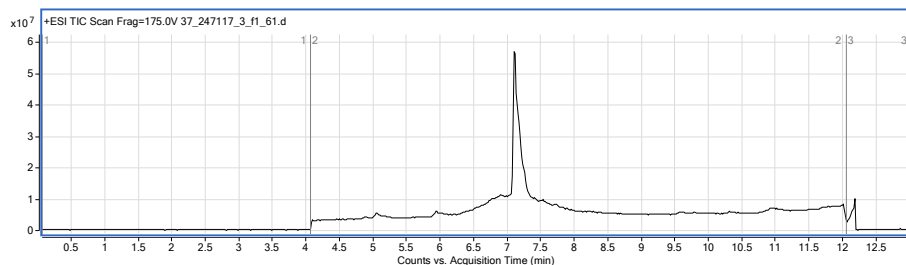

**Mass spectrum of major compound**

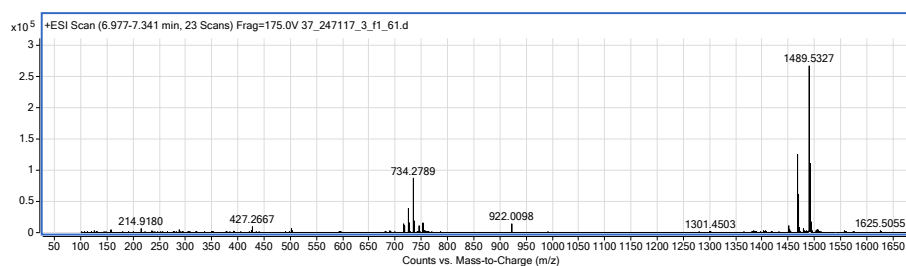

### Peptide 38

**Sequence:** ASFAC\*YWAC\*LSA-CONH<sub>2</sub> (C\*: hexafluorobenzene-stapled cysteine)

**HPLC:** Method E

**HRMS (ESI-QTOF):** Calcd. for (M + 2H)<sup>2+</sup>: 719.260, found: 719.274. ppm=15

**Total ion chromatogram:**

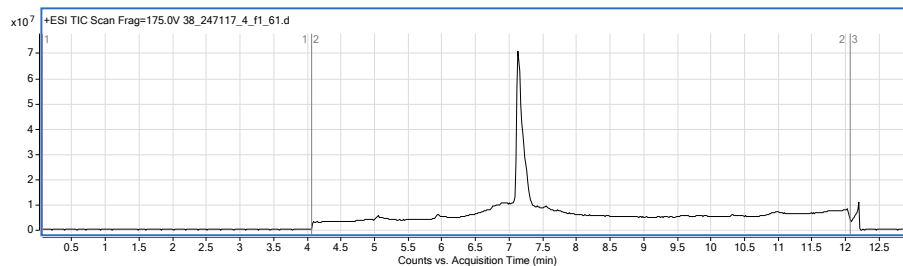

**Mass spectrum of major compound**

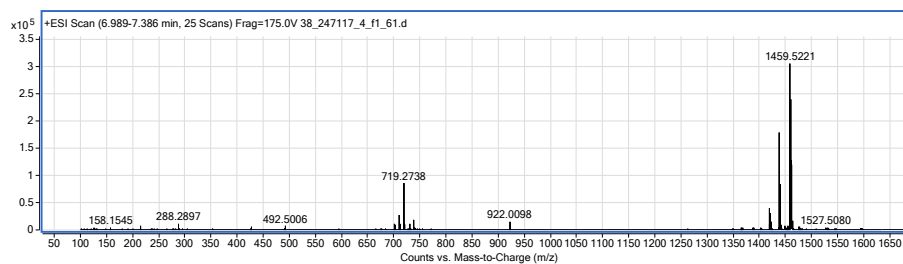

### Peptide 39

**Sequence:** ASFAEYWC\*ALAC\*-CONH<sub>2</sub> (C\*: hexafluorobenzene-stapled cysteine)

**HPLC:** Method E

**HRMS (ESI-QTOF):** Calcd. for (M + H)<sup>+</sup>: 1479.530, found: 1479.551. ppm=13

**Total ion chromatogram:**

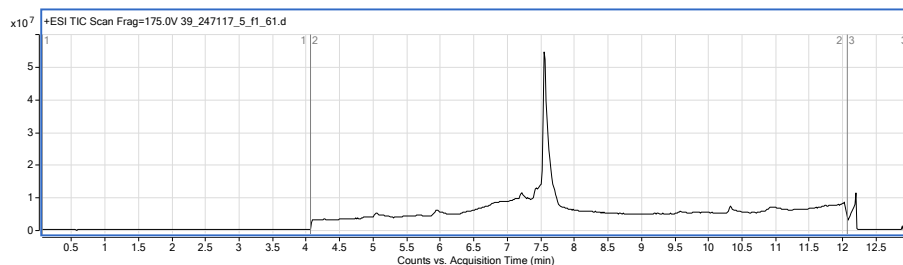

**Mass spectrum of major compound**

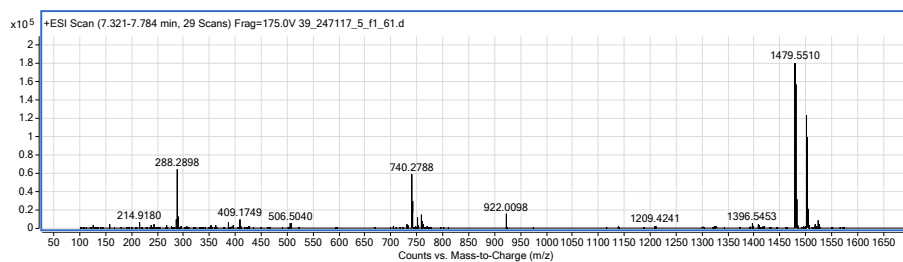

## Peptide 40

**Sequence:** TSFAEYWC\*ALSC\*-CONH<sub>2</sub> (C\*: hexafluorobenzene-stapled cysteine)

**HPLC:** Method E

**HRMS (ESI-QTOF):** Calcd. for (M + H)<sup>+</sup>: 1525.536, found: 1525.556. ppm=13

**Total ion chromatogram:**

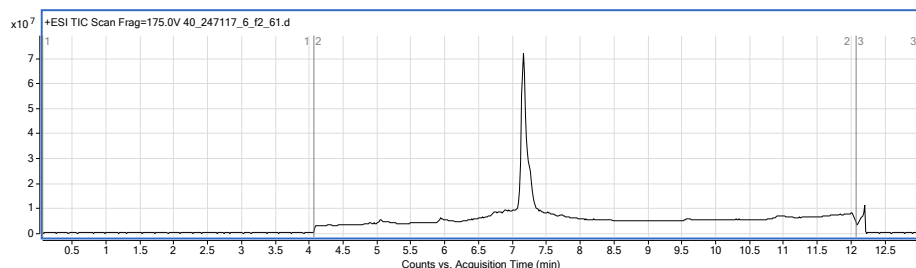

**Mass spectrum of major compound**

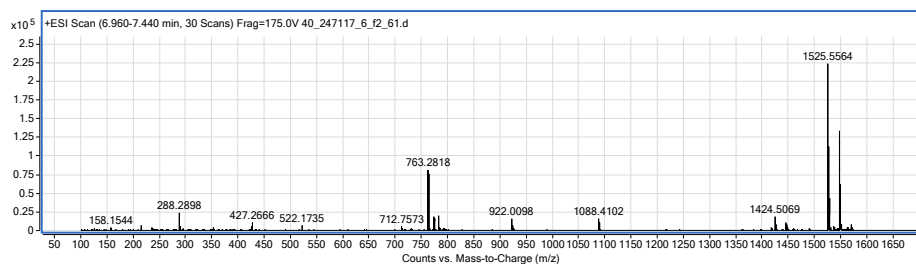

## 6. Supplementary Methods 4: Binding validation by bio-layer interferometry

### 6.1 Methods for BLI assay

In vitro binding assay was performed using ForteBio Octet RED96 BLI system (Octet RED96). In a typical experiment, the streptavidin (SA) tips were dipped in 200  $\mu$ L biotinylated- peptide solution (2.0  $\mu$ M in PBS with 0.02% Tween 20 and 1 mg/mL BSA) for the loading step. The loaded tips were then dipped in the sample wells for association curves. Buffer-only condition were used as reference for background subtraction. After association, the tips were dipped in blocking buffer (1x PBS, 0.02% Tween 20, 1 mg/mL BSA) to obtain dissociation curve. The association and dissociation curves were fitted by the global fitting algorithm, under binding model 1:1 to obtain the binding response value (R) in nm.

Streptavidin sensors were soaked in blocking buffer for 5 min. After immobilizing the PEG4-biotinylated peptide (100 nM of Biotin-PEG4-peptide) onto streptavidin sensors, serial dilutions of SUMO-<sup>25-109</sup>MDM2 in blocking buffer were analyzed for binding (500 nM, 250 nM, 125 nM, 63nM, 32 nM, 16 nM, 8 nM and 4 nM. The response was recorded at equilibrium after 2 min.

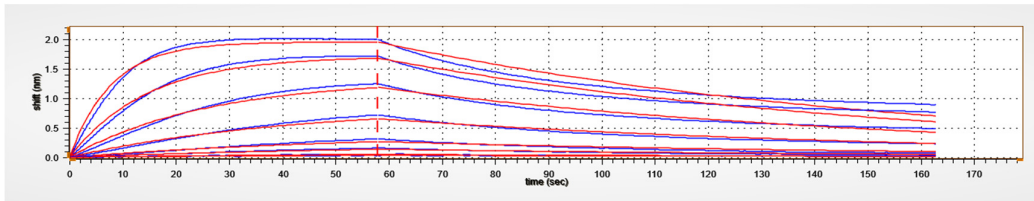

Compound name: **32-biotin**

Sequence: Biotin-PEG4-TAFAAYWAALAAK

$k_{\text{off}} = 0.00981 \text{ (s}^{-1}\text{)}$ .  $k_{\text{on}} = 6.33\text{E}+05 \text{ (M}^{-1} \text{s}^{-1}\text{)}$ .  $K_D = 1.55\text{E}-08 \text{ (M)}$

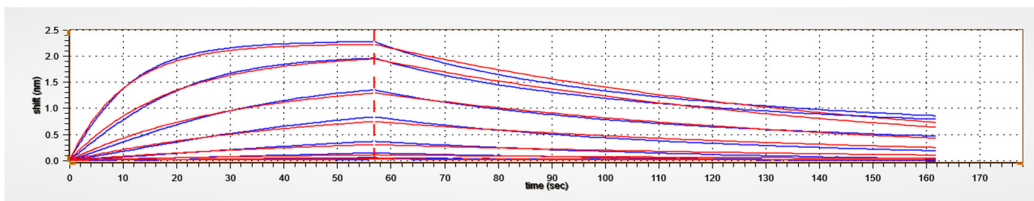

Compound name: **33-biotin.**

Sequence: Biotin-PEG4-ASFAAYWAALAAK

$k_{\text{off}} = 0.0107 \text{ (s}^{-1}\text{)}$ .  $k_{\text{on}} = 1.70\text{E}+05 \text{ (M}^{-1} \text{s}^{-1}\text{)}$ .  $K_D = 6.28\text{E}-08 \text{ (M)}$

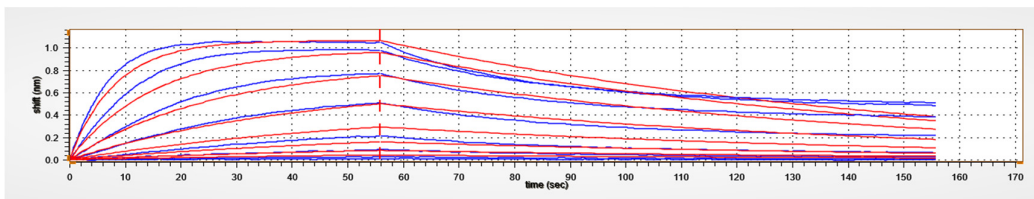

Compound name: **34-biotin.**

Sequence: Biotin-PEG4-AAFAAYWAALAAK

$k_{\text{off}} = 0.0102 \text{ (s}^{-1}\text{)}$ .  $k_{\text{on}} = 8.24\text{E}+05 \text{ (M}^{-1} \text{s}^{-1}\text{)}$ .  $K_D = 1.22\text{E}-08 \text{ (M)}$

## 6.2 Methods for BLI competition assay

In vitro binding assay was performed using ForteBio Octet RED96 BLI system (Octet RED96). In a typical experiment, the streptavidin (SA) tips were dipped in 200  $\mu\text{L}$  biotinylated- peptide solution (2.0  $\mu\text{M}$  in PBS with 0.02% Tween 20 and 1 mg/mL BSA) for the loading step. The loaded tips were then dipped in the sample wells for association curves. Buffer-only condition were used as reference for background subtraction. After association, the tips were dipped in blocking buffer (1x PBS, 0.02% Tween 20, 1 mg/mL BSA) to obtain dissociation curve. The association and dissociation curves were fitted by the global fitting algorithm, under binding model 1:1 to obtain the binding response value (R) in nm.

**Competition BLI assay:** Various concentrations of peptides were incubated in wells with 100 nM SUMO-<sup>25-109</sup>MDM2 protein in the kinetic buffer for 30 min. The PEG4-biotinylated p53<sup>15-29</sup> peptide was immobilized onto streptavidin sensors and dipped into preincubated sample wells. The association events were measured at 30 °C, 1,000 rpm. Response at equilibrium after 2 min was recorded. Based on the binding response (nm) values, the concentration of 'free' MDM2 was interpolated for each sample using the calibration curve. The free [MDM2] was denoted as [Y], and represents the amount of MDM2 available in solution to bind to the immobilized peptide ligand on the BLI sensor. Constant b is the total MDM2 concentration provided in the assay.

The dissociation constant,  $K_D$ , can be obtained from the following equation:

$$Kd = \frac{\text{Free [peptide]} \times \text{Free [MDM2]}}{[\text{peptide protein complex}]} = \frac{[X - (b - Y)] \times Y}{(b - Y)} \quad \text{supplementary equation (1)}$$

Reorganize equation (1):

$$Y^2 + (Kd + X - b) \times Y - b \times Kd = 0 \quad \text{supplementary equation (2)}$$

Solving equation (2), we have:

$$[Y] = 0.5 \times [b - K_d - [X] + \sqrt{([X] + K_d - b)^2 + 4b \times K_d}] \quad \text{supplementary eqn. (3)}$$

Non-linear regression analysis was performed in Prism 8 using the supplementary equation (3), where [Y] is the free [MDM2] in nM, and [X] is the total [peptide] in nM.  $K_D$  is the binding dissociation constant to be fitted by the curve. b is the maximal possible [MDM2] called  $Y_{\max}$ , a constant to be fitted by the regression. By fitting the free [MDM2] and [peptide] to the equation, a competition binding curve and a binding constant with a standard mean error were generated by the fitting program. The free protein concentration [Y] can be obtained from the response (nm) using the calibration curve described as follows.

**Calibration curve:** Streptavidin sensors were soaked in blocking buffer for 5 min. After immobilizing the PEG4-biotinylated <sup>15-29</sup>p53 peptide (100 nM of Biotin-PEG4-SQETFSDLWKLLPEN) onto streptavidin sensors, serial dilutions of SUMO-<sup>25-109</sup>MDM2 in blocking buffer were analyzed for binding (2500 nM, 1250 nM, 625 nM, 312 nM, 156 nM, 78 nM, 50 nM, 25 nM, 13 nM, 6 nM, 3 nM, 2 nM and 1 nM). The response was recorded at equilibrium after 2 min. The concentration of stock SUMO-<sup>25-109</sup>MDM2 was confirmed by the Bradford assay.

A curve of sensor response (nm) vs. MDM2 concentration (nM) was generated to calibrate the free MDM2 concentration in solution observed in the competition binding assay. The curve was generated using Prism 8. Approximately 50 or 100 nM of protein was subsequently used in most competition assays, as it follows the pseudo-first order kinetics that would not saturate the biosensor tip response. 250 nM of protein was used in the case of Peptide **9** as described in the following sections.

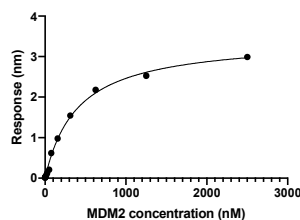

*The calibration curve of SUMO-109MDM2 protein concentration when PEG4-biotinylated 15-29p53 peptide was immobilized on the streptavidin tip.*

**Validation of the competition BLI assay:** PMI (TSFAEYWNLSP) peptide binding validation. Approximately 50 nM SUMO-<sup>25-109</sup>MDM2 and peptide **1** (700 nM, 350 nM, 175 nM, 88 nM, 44 nM, 22 nM, and 11 nM) were mixed together following the protocol for in solution competition assay. Free [MDM2] was estimated using the biotin-p53 peptide calibration curve and the obtained titration curve was fitted. Averaged  $K_D$  was  $7.7 \pm 4.5$  nM over three measurements.

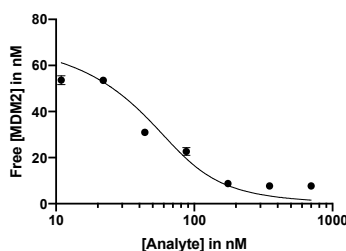

### 6.3 Results of competition BLI assay

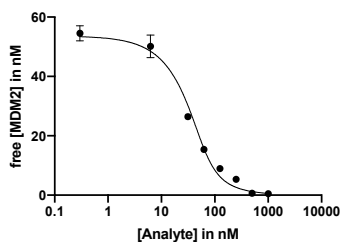

Peptide **1** binding validation. Approximately 50 nM SUMO-<sup>25-109</sup>MDM2 and peptide **1** (1000 nM, 500 nM, 250 nM, 125 nM, 62 nM, 31 nM, 6 nM and 0.3 nM) were mixed together following the protocol for in solution competition assay. Free [MDM2] was estimated using the biotin-p53 calibration curve and the obtained titration curve was fitted. Averaged  $K_D$  was  $10 \pm 2.3$  nM over three measurements.

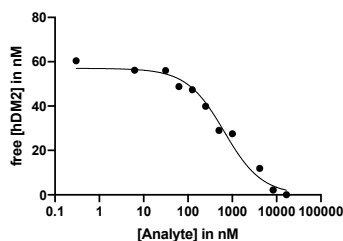

Peptide **2** binding validation. Approximately 50 nM SUMO-<sup>25-109</sup>MDM2 and peptide **2** (16667 nM, 8333 nM, 4166 nM, 1000 nM, 500 nM, 250 nM, 125 nM, 62 nM, 31 nM, 6 nM and 0.3 nM) were mixed together following the protocol for in solution competition assay. Free [MDM2] was estimated using the biotin-p53 calibration curve and the obtained titration curve was fitted. Averaged  $K_D$  was  $628 \pm 89$  nM over three measurements.

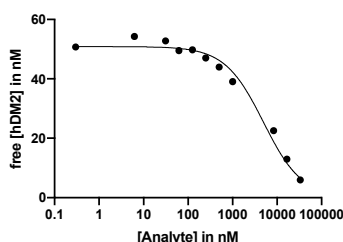

Peptide **3** binding validation. Approximately 50 nM SUMO-<sup>25-109</sup>MDM2 and peptide **3** (33333 nM, 16667 nM, 8333 nM, 4166 nM, 1000 nM, 500 nM, 250 nM, 125 nM, 62 nM, 31 nM, 6 nM and 0.3 nM) were mixed together following the protocol for in solution competition assay. Free [MDM2] was estimated using the biotin-p53 calibration curve and the obtained titration curve was fitted. Averaged  $K_D$  was  $4912 \pm 713$  nM over three measurements.

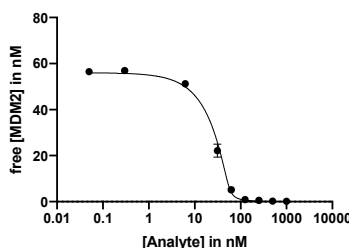

Peptide **4** binding validation. Approximately 50 nM SUMO-<sup>25-109</sup>MDM2 and peptide **4** (1000 nM, 500 nM, 250 nM, 125 nM, 62 nM, 31 nM, 16 nM, 3 nM and 0.1 nM) were mixed together following the protocol for in solution competition assay. Free [MDM2] was estimated using the biotin-p53 calibration curve and the obtained titration curve was fitted. Averaged  $K_D$  was  $0.8 \pm 0.6$  nM over five measurements.

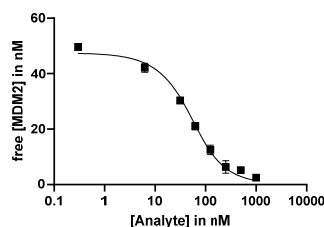

Peptide **5** binding validation. Approximately 50 nM SUMO-<sup>25-109</sup>MDM2 and peptide **5** (1000 nM, 500 nM, 250 nM, 125 nM, 62 nM, 31 nM, 6 nM and 0.3 nM) were mixed together following the protocol for in solution competition assay. Free [MDM2] was estimated using the biotin-p53 calibration curve and the obtained titration curve was fitted. Averaged  $K_D$  was  $30 \pm 3.8$  nM over three measurements.

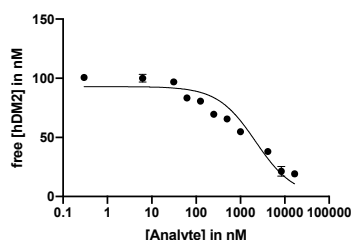

Peptide **6** binding validation. Approximately 100 nM SUMO-<sup>25-109</sup>MDM2 and peptide **6** (16667 nM, 8133 nM, 4166 nM, 1000 nM, 500 nM, 250 nM, 125 nM, 62 nM, 31 nM and 6 nM) were mixed together following the protocol for in solution competition assay. Free [MDM2] was estimated using the biotin-p53 calibration curve and the obtained titration curve was fitted. Averaged  $K_D$  was  $2144 \pm 390$  nM over three measurements.

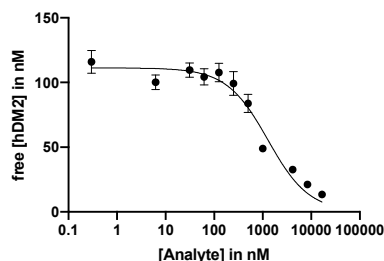

Peptide **7** binding validation. Approximately 100 nM SUMO-<sup>25-109</sup>MDM2 and peptide **7** (16667 nM, 8133 nM, 4166 nM, 1000 nM, 500 nM, 250 nM, 125 nM, 62 nM, 31 nM, 6 nM and 0.3 nM) were mixed together following the protocol for in solution competition assay. Free [MDM2] was estimated using the biotin-p53 calibration curve and the obtained titration curve was fitted. Averaged  $K_D$  was  $1224 \pm 231$  nM over three measurements.

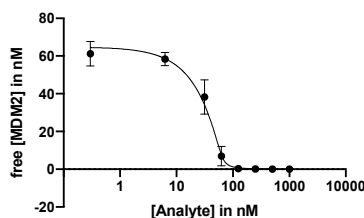

Peptide **8** binding validation. 50 nM SUMO-<sup>25-109</sup>MDM2 and peptide **8** (1000 nM, 500 nM, 250 nM, 125 nM, 62 nM, 31 nM, 6 nM, and 0.3 nM) were mixed together following the protocol for in solution competition assay. Free [MDM2] was estimated using the biotin-p53 calibration curve and the obtained titration curve was fitted. Averaged  $K_D$  was  $0.7 \pm 0.5$  nM over three measurements.

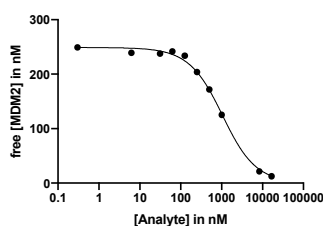

Peptide **9** binding validation. Approximately 250 nM SUMO-<sup>25-109</sup>MDM2 and peptide **9** (16667 nM, 8133 nM, 1000 nM, 500 nM, 250 nM, 125 nM, 62 nM, 31 nM, 6 nM and 0.3 nM) were mixed together following the protocol for in solution competition assay. Free [MDM2] was estimated using the biotin-p53 calibration curve and the obtained titration curve was fitted.  $K_D$  was  $925 \pm 70$  nM (N=1).

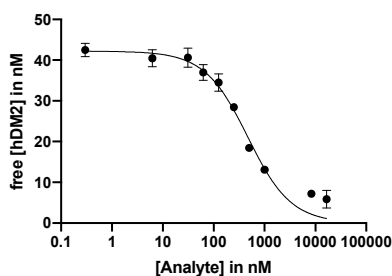

Peptide **10** binding validation. Approximately 50 nM SUMO-<sup>25-109</sup>MDM2 and peptide **10** (16667 nM, 8133 nM, 1000 nM, 500 nM, 250 nM, 125 nM, 62 nM, 31 nM, 6 nM and 0.3 nM) were mixed together following the protocol for in solution competition assay. Free [MDM2] was estimated using the biotin-p53 calibration curve and the obtained titration curve was fitted. Averaged  $K_D$  was  $431 \pm 46$  nM over three measurements.

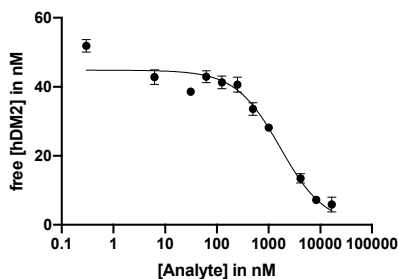

Peptide **11** binding validation. Approximately 50 nM SUMO<sup>-25-109</sup>MDM2 and peptide **11** (16667 nM, 8133 nM, 4166nM, 1000 nM, 500 nM, 250 nM, 125 nM, 62 nM, 31 nM, 6 nM and 0.3 nM) were mixed together following the protocol for in solution competition assay. Free [MDM2] was estimated using the biotin-p53 calibration curve and the obtained titration curve was fitted. Averaged  $K_D$  was  $1588 \pm 315$  nM over three measurements.

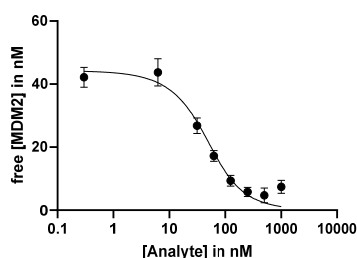

Peptide **12** binding validation. Approximately 50 nM SUMO<sup>-25-109</sup>MDM2 and peptide **12** (1000 nM, 500 nM, 250 nM, 125 nM, 62 nM, 31 nM, 6 nM and 0.3 nM) were mixed together following the protocol for in solution competition assay. Free [MDM2] was estimated using the biotin-p53 calibration curve and the obtained titration curve was fitted. Averaged  $K_D$  was  $26 \pm 5.0$  nM over three measurements.

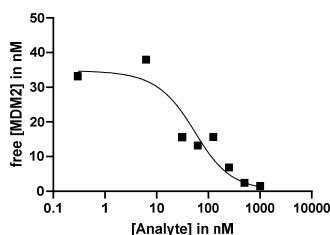

Peptide **13** binding validation. Approximately 30 nM SUMO<sup>-25-109</sup>MDM2 and peptide **13** (1000 nM, 500 nM, 250 nM, 125 nM, 62 nM, 31 nM, 6 nM and 0.3 nM) were mixed together following the protocol for in solution competition assay. Free [MDM2] was estimated using the biotin-p53 calibration curve and the obtained titration curve was fitted. Averaged  $K_D$  was  $36 \pm 8.5$  nM over three measurements.

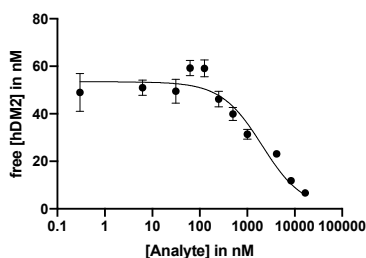

Peptide **14** binding validation. Approximately 50 nM SUMO<sup>-25-109</sup>MDM2 and peptide **14** (16667 nM, 8133 nM, 4166nM, 1000 nM, 500 nM, 250 nM, 125 nM, 62 nM, 31 nM, 6 nM and 0.3 nM) were mixed together following the protocol for in solution competition assay. Free [MDM2] was estimated using the biotin-p53 calibration curve and the obtained titration curve was fitted. Averaged  $K_D$  was  $2017 \pm 514$  nM over three measurements.

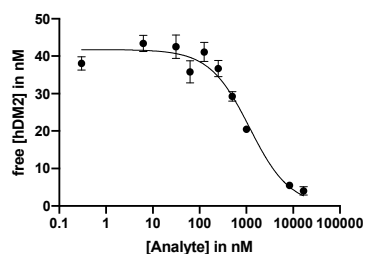

Peptide **15** binding validation. Approximately 40 nM SUMO<sup>-25-109</sup>MDM2 and peptide **15** (16667 nM, 8133 nM, 1000 nM, 500 nM, 250 nM, 125 nM, 62 nM, 31 nM, 6 nM and 0.3 nM) were mixed together following the protocol for in solution competition assay. Free [MDM2] was estimated using the biotin-p53 calibration curve and the obtained titration curve was fitted. Averaged  $K_D$  was  $1151 \pm 209$  nM over three measurements.

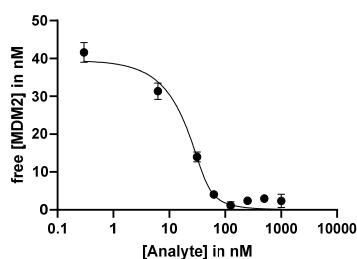

Peptide **16** binding validation. Approximately 40 nM SUMO<sup>-25-109</sup>MDM2 and peptide **16** (1000 nM, 500 nM, 250 nM, 125 nM, 62 nM, 31 nM, 6 nM and 0.3 nM) were mixed together following the protocol for in solution competition assay. Free [MDM2] was estimated using the biotin-p53 calibration curve and the obtained titration curve was fitted. Averaged  $K_D$  was  $3.0 \pm 1.3$  nM over three measurements.

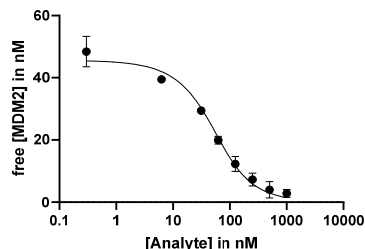

Peptide **17** binding validation. Approximately 50 nM SUMO<sup>25-109</sup>MDM2 and peptide **17** (1000 nM, 500 nM, 250 nM, 125 nM, 62 nM, 31 nM, 6 nM and 0.3 nM) were mixed together following the protocol for in solution competition assay. Free [MDM2] was estimated using the biotin-p53 calibration curve and the obtained titration curve was fitted. Averaged  $K_D$  was  $32 \pm 4.2$  nM over three measurements.

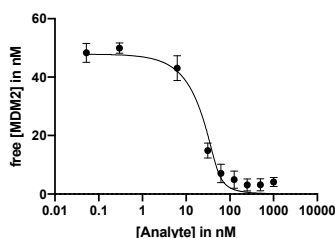

Peptide **18** binding validation. Approximately 50 nM SUMO<sup>25-109</sup>MDM2 and peptide **18** (1000 nM, 500 nM, 250 nM, 125 nM, 62 nM, 31 nM, 6 nM and 0.3 nM) were mixed together following the protocol for in solution competition assay. Free [MDM2] was estimated using the biotin-p53 calibration curve and the obtained titration curve was fitted. Averaged  $K_D$  was  $2.7 \pm 1.9$  nM over three measurements.

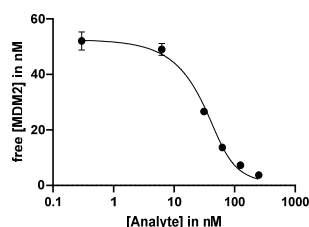

Peptide **19** binding validation. Approximately 50 nM SUMO<sup>25-109</sup>MDM2 and peptide **19** (250 nM, 125 nM, 62 nM, 31 nM, 6 nM and 0.3 nM) were mixed together following the protocol for in solution competition assay. Free [MDM2] was estimated using the biotin-p53 calibration curve and the obtained titration curve was fitted. Averaged  $K_D$  was  $8.8 \pm 1.9$  nM over three measurements.

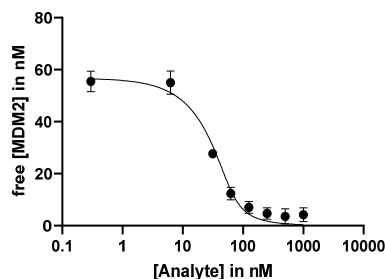

Peptide **20** binding validation. Approximately 50 nM SUMO-<sup>25-109</sup>MDM2 and peptide **20** (1000 nM, 500 nM, 250 nM, 125 nM, 62 nM, 31 nM, 6 nM and 0.3 nM) were mixed together following the protocol for in solution competition assay. Free [MDM2] was estimated using the biotin-p53 calibration curve and the obtained titration curve was fitted. Averaged  $K_D$  was  $6.2 \pm 1.8$  nM over three measurements.

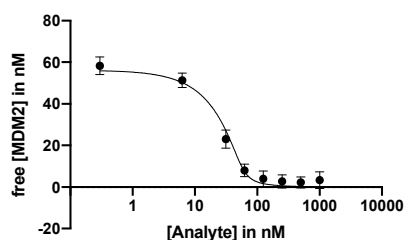

Peptide **21** binding validation. Approximately 50 nM SUMO-<sup>25-109</sup>MDM2 and peptide **21** (1000 nM, 500 nM, 250 nM, 125 nM, 62 nM, 31 nM, 6 nM and 0.3 nM) were mixed together following the protocol for in solution competition assay. Free [MDM2] was estimated using the biotin-p53 calibration curve and the obtained titration curve was fitted. Averaged  $K_D$  was  $2.1 \pm 1.3$  nM over three measurements.

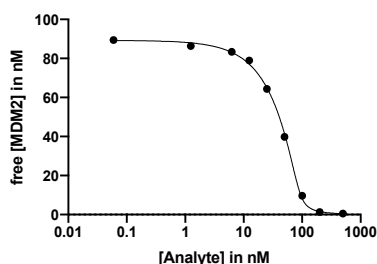

Peptide **22** binding validation. Approximately 90 nM SUMO-<sup>25-109</sup>MDM2 and peptide **22** (500 nM, 200 nM, 100 nM, 50 nM, 25 nM, 13 nM, 6nM, 1nM and 0.06 nM) were mixed together following the protocol for in solution competition assay. Free [MDM2] was estimated using the biotin-p53 calibration curve and the obtained titration curve was fitted.  $K_D$  was  $2.0 \pm 1.3$  nM over three measurements.

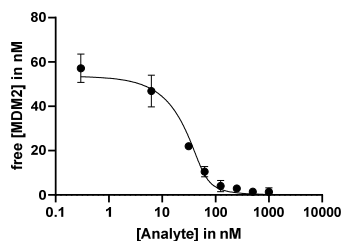

Peptide **23** binding validation. Approximately 50 nM SUMO<sup>25-109</sup>MDM2 and peptide **23** (1000 nM, 500 nM, 250 nM, 125 nM, 62 nM, 31 nM, 6 nM and 0.3 nM) were mixed together following the protocol for in solution competition assay. Free [MDM2] was estimated using the biotin-p53 calibration curve and the obtained titration curve was fitted. Averaged  $K_D$  was  $3.7 \pm 1.5$  nM over three measurements.

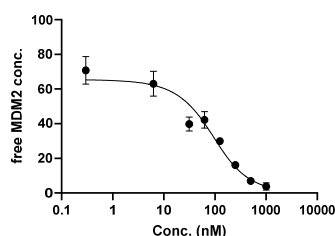

Peptide **24** binding validation. Approximately 80 nM SUMO<sup>25-109</sup>MDM2 and peptide **24** (1000 nM, 500 nM, 250 nM, 125 nM, 62 nM, 31 nM, 6 nM and 0.3 nM) were mixed together following the protocol for in solution competition assay. Free [MDM2] was estimated using the biotin-p53 calibration curve and the obtained titration curve was fitted. Averaged  $K_D$  was  $59 \pm 11$  nM over three measurements.

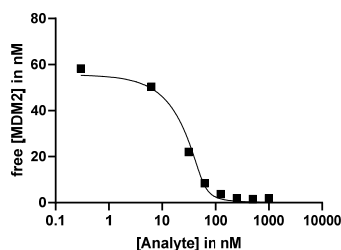

Peptide **25** binding validation. Approximately 50 nM SUMO<sup>25-109</sup>MDM2 and peptide **25** (1000 nM, 500 nM, 250 nM, 125 nM, 62 nM, 31 nM, 6 nM and 0.3 nM) were mixed together following the protocol for in solution competition assay. Free [MDM2] was estimated using the biotin-p53 calibration curve and the obtained titration curve was fitted. Averaged  $K_D$  was  $2.2 \pm 0.8$  nM over three measurements.

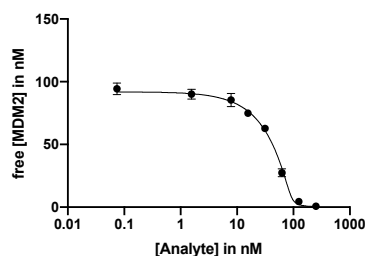

Peptide **26** binding validation. Approximately 100 nM SUMO<sup>-25-109</sup>MDM2 and peptide **26** (250 nM, 125 nM, 62 nM, 31 nM, 16 nM, 8 nM, 2 nM and 0.1 nM) were mixed together following the protocol for in solution competition assay. Free [MDM2] was estimated using the biotin-p53 calibration curve and the obtained titration curve was fitted. Averaged  $K_D$  was  $1.0 \pm 0.8$  nM over three measurements.

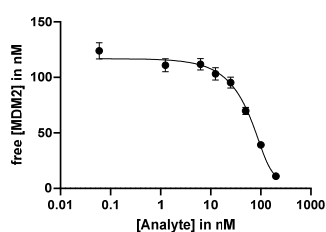

Peptide **27** binding validation. Approximately 100 nM SUMO<sup>-25-109</sup>MDM2 and peptide **27** (1000 nM, 500 nM, 250 nM, 125 nM, 62 nM, 31 nM, 6 nM and 0.3 nM) were mixed together following the protocol for in solution competition assay. Free [MDM2] was estimated using the biotin-p53 calibration curve and the obtained titration curve was fitted. Averaged  $K_D$  was  $10 \pm 3.3$  nM over three measurements.

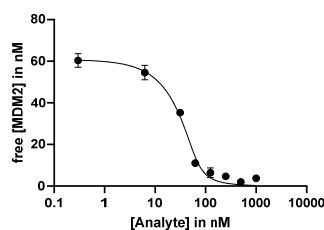

Peptide **28** binding validation. Approximately 60 nM SUMO<sup>-25-109</sup>MDM2 and peptide **28** (1000 nM, 500 nM, 250 nM, 125 nM, 62 nM, 31 nM, 6 nM and 0.3 nM) were mixed together following the protocol for in solution competition assay. Free [MDM2] was estimated using the biotin-p53 calibration curve and the obtained titration curve was fitted. Averaged  $K_D$  was  $4.7 \pm 1.5$  nM over three measurements.

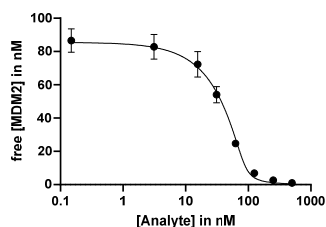

Peptide **29** binding validation. Approximately 80 nM SUMO<sup>-25-109</sup>MDM2 and peptide **29** (500 nM, 250 nM, 125 nM, 62 nM, 31 nM, 16 nM, 3 nM and 0.1 nM) were mixed together following the protocol for in solution competition assay. Free [MDM2] was estimated using the biotin-PMI calibration curve and the obtained titration curve was fitted. Averaged  $K_D$  was  $2.3 \pm 1.2$  nM over three measurements.

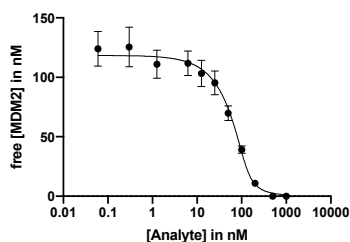

Peptide **30** binding validation. Approximately 100 nM SUMO<sup>-25-109</sup>MDM2 and peptide **30** (500 nM, 250 nM, 125 nM, 62 nM, 31 nM, 16 nM, 3 nM and 0.1 nM) were mixed together following the protocol for in solution competition assay. Free [MDM2] was estimated using the biotin-PMI calibration curve and the obtained titration curve was fitted. Averaged  $K_D$  was  $8.6 \pm 2.7$  nM over three measurements.

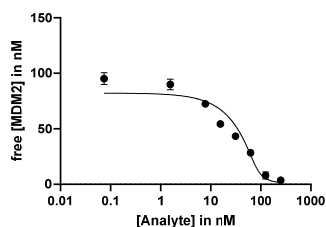

Peptide **31** binding validation. Approximately 100 nM SUMO<sup>-25-109</sup>MDM2 and peptide **31** (500 nM, 250 nM, 125 nM, 62 nM, 31 nM, 16 nM, 3 nM and 0.1 nM) were mixed together following the protocol for in solution competition assay. Free [MDM2] was estimated using the biotin-p53 calibration curve and the obtained titration curve was fitted. Averaged  $K_D$  was  $3.2 \pm 2.6$  nM over three measurements.

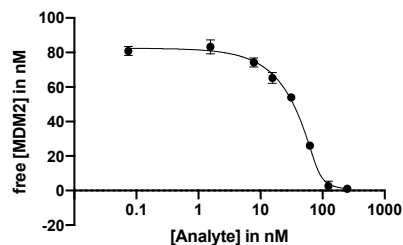

Peptide **32** binding validation. Approximately 80 nM SUMO<sup>25-109</sup>MDM2 and peptide **32** (1000 nM, 500 nM, 250 nM, 125 nM, 62 nM and 31 nM) were mixed together following the protocol for in solution competition assay. Free [MDM2] was estimated using the biotin-p53 calibration curve and the obtained titration curve was fitted. Averaged  $K_D$  was  $2.3 \pm 0.8$  nM over three measurements.

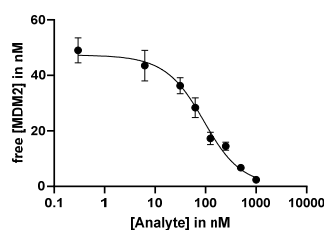

Peptide **33** binding validation. Approximately 50 nM SUMO<sup>25-109</sup>MDM2 and peptide **33** (1000 nM, 500 nM, 250 nM, 125 nM, 62 nM, 31 nM, 6 nM and 0.3 nM) were mixed together following the protocol for in solution competition assay. Free [MDM2] was estimated using the biotin-p53 calibration curve and the obtained titration curve was fitted. Averaged  $K_D$  was  $67 \pm 14$  nM over three measurements.

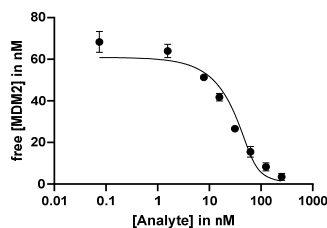

Peptide **34** binding validation. Approximately 60 nM SUMO<sup>25-109</sup>MDM2 and peptide **34** (1000 nM, 500 nM, 250 nM, 125 nM, 62 nM, 31 nM, 6 nM and 0.3 nM) were mixed together following the protocol for in solution competition assay. Free [MDM2] was estimated using the biotin-p53 calibration curve and the obtained titration curve was fitted. Averaged  $K_D$  was  $4.7 \pm 2.4$  nM over three measurements.

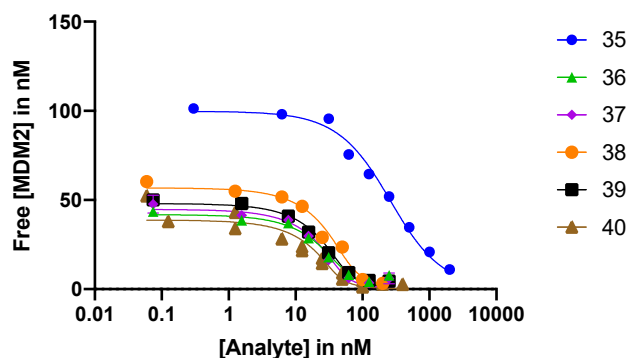

Peptide **35** binding validation. Approximately 100 nM SUMO-<sup>25-109</sup>MDM2 and peptide **35** (2000 nM, 1000 nM, 500 nM, 250 nM, 125 nM, 62 nM, 31 nM, 6 nM and 0.3 nM) were mixed together following the protocol for in solution competition assay. Free [MDM2] was estimated using the biotin-p53 calibration curve and the obtained titration curve was fitted. Averaged  $K_D$  was  $316 \pm 27$  nM over three measurements.

Peptide **36** binding validation. Approximately 50 nM SUMO-<sup>25-109</sup>MDM2 and peptide **36** (250 nM, 125 nM, 62 nM, 31 nM, 6 nM and 0.3 nM) were mixed together following the protocol for in solution competition assay. Free [MDM2] was estimated using the biotin-p53 calibration curve and the obtained titration curve was fitted. Averaged  $K_D$  was  $4.4 \pm 1.9$  nM over three measurements.

Peptide **37** binding validation. Approximately 50 nM SUMO-<sup>25-109</sup>MDM2 and peptide **37** (250 nM, 125 nM, 62 nM, 31 nM, 15 nM, 8 nM, 1.5 nM and 0.1 nM) were mixed together following the protocol for in solution competition assay. Free [MDM2] was estimated using the biotin-p53 calibration curve and the obtained titration curve was fitted. Averaged  $K_D$  was  $1.6 \pm 1.3$  nM over three measurements.

Peptide **38** binding validation. Approximately 50 nM SUMO-<sup>25-109</sup>MDM2 and peptide **38** (200nM, 100 nM, 50 nM, 25 nM, 13 nM, 6.2 nM, 1.5 nM, 0.4 nM and 0.01 nM) were mixed together following the protocol for in solution competition assay. Free [MDM2] was estimated using the biotin-p53 calibration curve and the obtained titration curve was fitted. Averaged  $K_D$  was  $0.4 \pm 0.3$  nM over three measurements.

Peptide **39** binding validation. Approximately 50 nM SUMO-<sup>25-109</sup>MDM2 and peptide **39** (250 nM, 125 nM, 62 nM, 31 nM, 15 nM, 8 nM, 1.5 nM and 0.1 nM) were mixed together following the protocol for in solution competition assay. Free [MDM2] was estimated using the biotin-p53 calibration curve and the obtained titration curve was fitted. Averaged  $K_D$  was  $3.3 \pm 2.1$  nM over three measurements.

Peptide **40** binding validation. Approximately 50 nM SUMO<sup>-25-109</sup>MDM2 and peptide **40** (400 nM, 200 nM, 100 nM, 50 nM, 25 nM, 13 nM, 6.2 nM, 1.5 nM, 0.4 nM and 0.01 nM) were mixed together following the protocol for in solution competition assay. Free [MDM2] was estimated using the biotin-p53 calibration curve and the obtained titration curve was fitted. Averaged  $K_D$  was  $0.2 \pm 0.1$  nM over three measurements.

## 7. Supplementary References

- (1) Quartararo, A. J.; Gates, Z. P.; Somsen, B. A.; Hartrampf, N.; Ye, X.; Shimada, A.; Kajihara, Y.; Ottmann, C.; Pentelute, B. L. Ultra-Large Chemical Libraries for the Discovery of High-Affinity Peptide Binders. *Nat. Commun.* **2020**, *11* (1), 3183.
- (2) Rabideau, A. E.; Liao, X.; Pentelute, B. L. Delivery of Mirror Image Polypeptides into Cells. *Chem. Sci.* **2015**, *6* (1), 648–653.
- (3) Li, C.; Pazgier, M.; Li, C.; Yuan, W.; Liu, M.; Wei, G.; Lu, W. Y.; Lu, W. Systematic Mutational Analysis of Peptide Inhibition of the P53-MDM2/MDMX Interactions. *J. Mol. Biol.* **2010**, *398* (2), 200–213.
- (4) Pettersen, E. F.; Goddard, T. D.; Huang, C. C.; Couch, G. S.; Greenblatt, D. M.; Meng, E. C.; Ferrin, T. E. UCSF Chimera: A Visualization System for Exploratory Research and Analysis. *J. Comput. Chem.* **2004**, *25* (13), 1605–1612.
- (5) Trott, O.; Olson, A. J. AutoDock Vina: Improving the Speed and Accuracy of Docking with a New Scoring Function, Efficient Optimization, and Multithreading. *J. Comput. Chem.* **2009**, NA-NA.
- (6) Mijalis, A. J.; Thomas, D. A.; Simon, M. D.; Adamo, A.; Beaumont, R.; Jensen, K. F.; Pentelute, B. L. A Fully Automated Flow-Based Approach for Accelerated Peptide Synthesis. *Nat. Chem. Biol.* **2017**, *13* (5), 464–466.
- (7) Wei, Y.; Thyparambil, A. A.; Latour, R. A. Protein Helical Structure Determination Using CD Spectroscopy for Solutions with Strong Background Absorbance from 190 to 230 Nm. *Biochim. Biophys. Acta - Proteins Proteomics* **2014**, *1844* (12), 2331–2337.
